# Supplementary material for: Multiplexed volumetric CLEM enabled by scFvs provides insights into the cytology of cerebellar cortex
Source: PubMed Central journal article supplement (PMC11300613; doi:10.1038/s41467-024-50411-z), 2024-08-05
Supplement: 41467_2024_50411_MOESM3_ESM.pdf [file 41467_2024_50411_MOESM3_ESM.pdf]

1 **Multiplexed volumetric CLEM enabled by scFvs provides new insights into the**  
2 **cytology of cerebellar cortex**

3 Xiaomeng Han<sup>1\*</sup>, Xiaotang Lu<sup>1\*</sup>, Peter H. Li<sup>2</sup>, Shuohong Wang<sup>1</sup>, Richard Schalek<sup>1</sup>, Yaron Meirovitch<sup>1</sup>,  
4 Zudi Lin<sup>3</sup>, Jason Adhinarta<sup>4</sup>, Karl D. Murray<sup>5</sup>, Leah M. MacNiven<sup>5</sup>, Daniel R. Berger<sup>1</sup>, Yuelong Wu<sup>1</sup>, Tao  
5 Fang<sup>6</sup>, Elif Sevde Meral<sup>7</sup>, Shadnan Asraf<sup>8</sup>, Hidde Ploegh<sup>6</sup>, Hanspeter Pfister<sup>5</sup>, Donglai Wei<sup>4</sup>, Viren Jain<sup>2</sup>,  
6 James S. Trimmer<sup>5</sup>, Jeff W. Lichtman<sup>1\*</sup>

7  
8 <sup>1</sup> Department of Molecular and Cellular Biology, Harvard University, Cambridge, MA

9 <sup>2</sup> Google Research, Mountain View, CA

10 <sup>3</sup> School of Engineering and Applied Sciences, Harvard University, Cambridge, MA

11 <sup>4</sup> Computer Science Department, Boston College, Chestnut Hill, MA

12 <sup>5</sup> Department of Physiology and Membrane Biology, University of California Davis School of Medicine,  
13 Davis, CA

14 <sup>6</sup> Program of Cellular and Molecular Medicine, Boston Children's Hospital, Boston, MA

15 <sup>7</sup> Bezmialem Vakif University School of Medicine, Istanbul, Turkey

16 <sup>8</sup> School of Public Health, University of Massachusetts Amherst, Amherst, MA

17  
18 \* Corresponding Authors: xiaomenghan@fas.harvard.edu, xiaotang\_lu@fas.harvard.edu,  
19 jeff@mcb.harvard.edu

20  
21 **Supplementary Materials**  
22

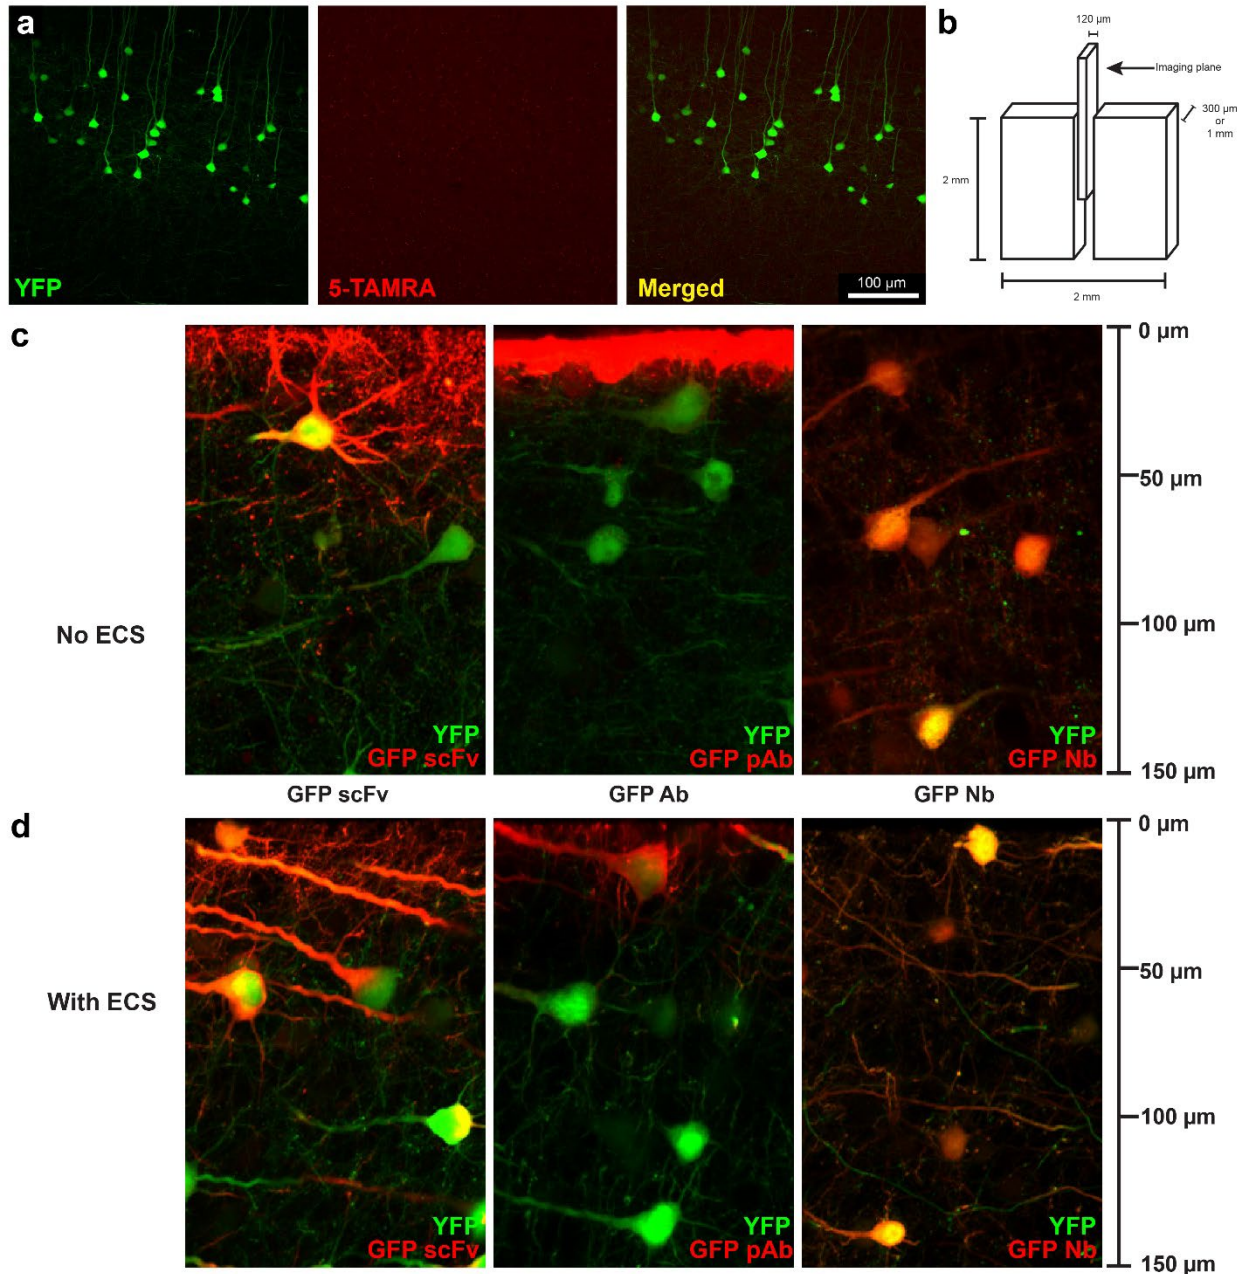

23  
24

**Sup. Figure 1. Characterization of the GFP-specific scFv.**

25 **a**, Representative confocal images (n=3 experiments, all experiments mentioned refer to independent  
 26 experiments) from the cerebral cortex of an unlabeled YFP-H mouse showing no signal in the red  
 27 channel. **b**, Schematic drawing showing how the tissue penetration was evaluated. After a brain tissue  
 28 section of 2 mm x 2 mm x 300  $\mu\text{m}$  (or 1 mm) was immunolabeled, 120- $\mu\text{m}$  sections across the thickness  
 29 (300  $\mu\text{m}$  or 1 mm) were cut and collected. The 120- $\mu\text{m}$  section from the middle was imaged in a way as  
 30 the arrow indicates. **c** and **d**, Tissue penetration depth comparison of scFVs, pAbs, and nanobodies  
 31 without or with the preservation of ECS (n=2 experiments). Without ECS preservation, after a free-floating  
 32 incubation of seven days, the scFv penetrated to a depth of  $\sim 60$   $\mu\text{m}$  into the tissue; the polyclonal anti-  
 33 GFP antibody penetrated to a depth of  $\sim 10$   $\mu\text{m}$ ; the nanobody can penetrate to a depth of  $\sim 150$   $\mu\text{m}$ . With  
 34 ECS preservation, after a free-floating incubation of seven days, the scFv penetrated to a depth of  $>100$   
 35  $\mu\text{m}$  into the tissue; the polyclonal anti-GFP antibody penetrated to a depth of  $\sim 30$   $\mu\text{m}$ ; the nanobody can

36 penetrate to a depth of ~150  $\mu\text{m}$ .  
37

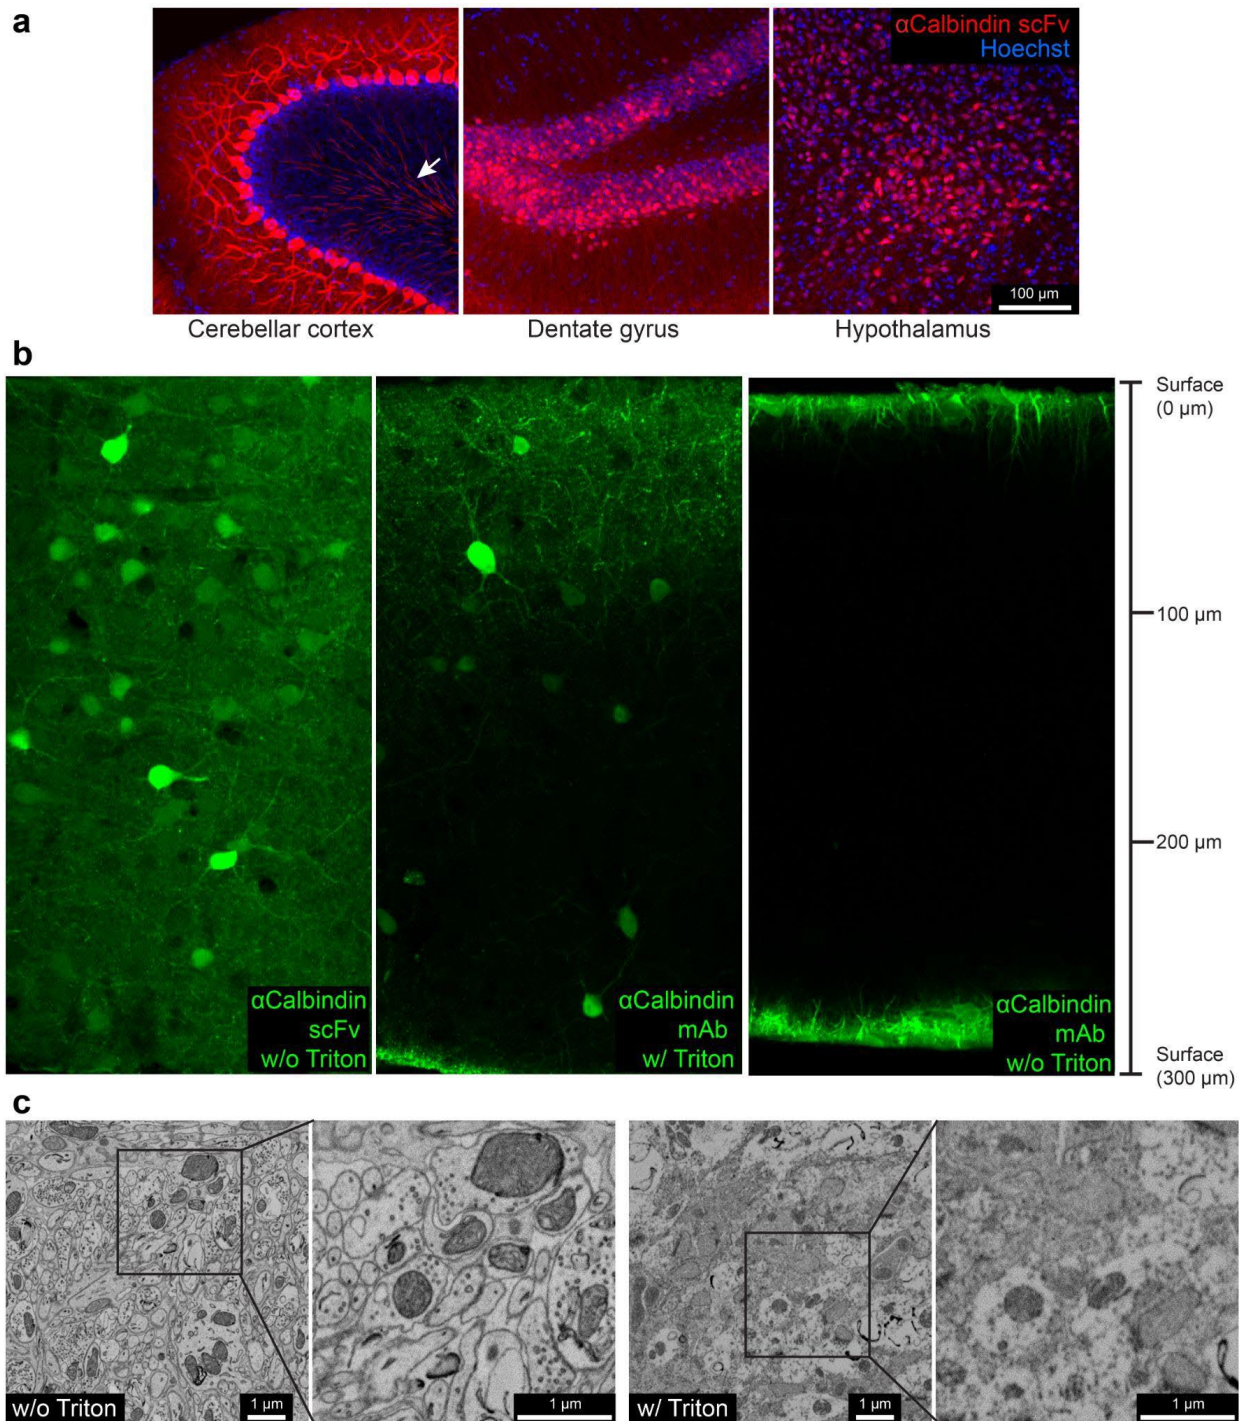

38 **Sup. Figure 2. Immunolabeling results of anti-calbindin scFv and tissue penetration comparison.**  
39  
40 **a**, Additional brain regions labeled with a calbindin-specific scFv probe conjugated with 5-TAMRA (n=3  
41 experiments). The arrow in the left panel shows myelinated Purkinje cell axons in the granule layer. **b**,  
42 Tissue penetration depth comparison of scFvs, mAbs (plus secondary antibodies), and the role of  
43 detergents in improving the depth of labeling (n=2 experiments). **c**, Comparison of ultrastructure with and



44 without 0.5% Triton X-100 on scFv labeled samples (n=2 experiments). Boxed insets are shown at higher  
45 magnification in adjacent panels.  
46  
47

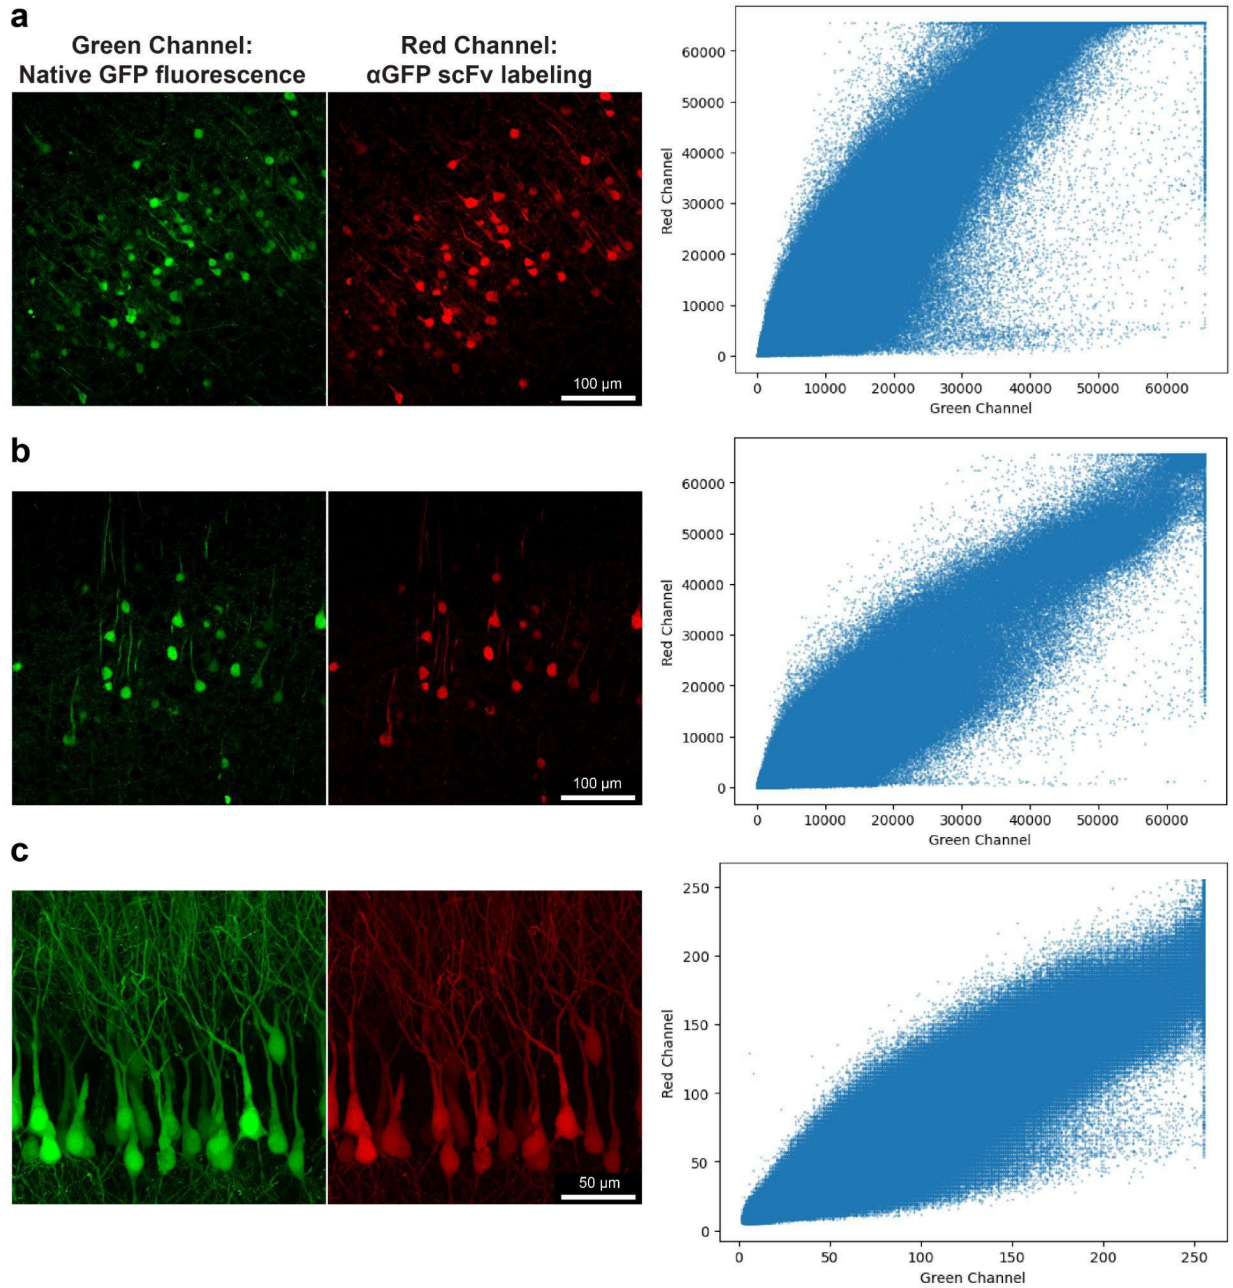

48 **Sup. Figure 3. Pixel correlation scatter plots compare the native YFP fluorescence signal and the**  
49 **red fluorescence from the labeling of the GFP-specific scFv.**  
50

51 Cerebral cortex samples (a and b) and hippocampus (c) from YFP-H mice were immunolabeled with a  
52 GFP-specific scFv conjugated with the red fluorophore 5-TAMRA. The images are raw data without any  
53 brightness/contrast adjustment. a is the raw image data of Figure 1 b.

54  
55  
56



57

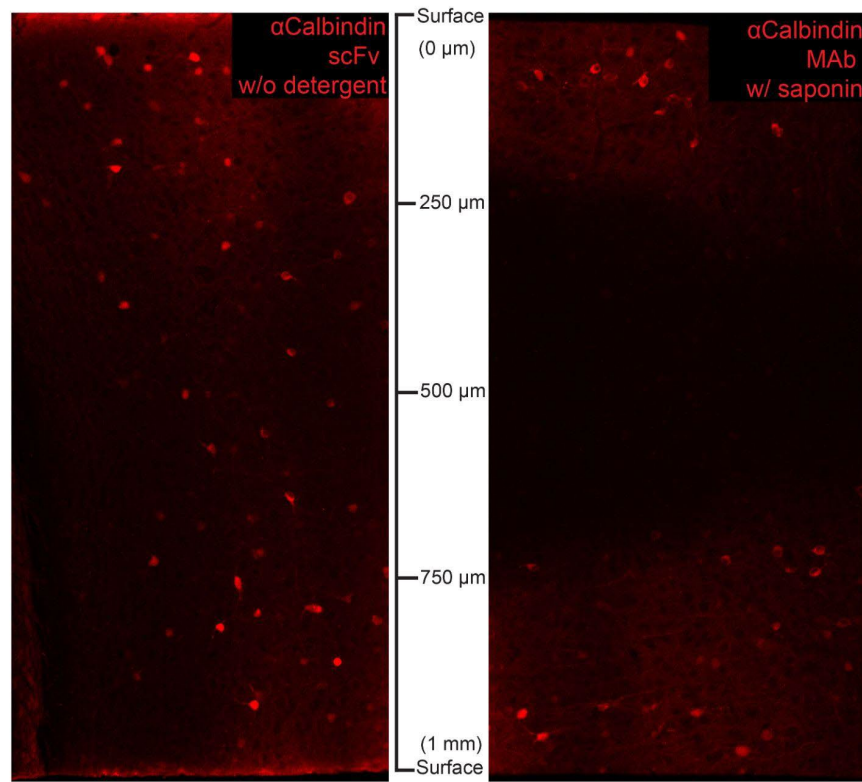

58  
59  
60

**Sup. Figure 4. Penetration of the anti-calbindin scFv into a 1-mm tissue sample.**

61 Tissue penetration depth comparison (n=2 experiments) of a calbindin-specific scFv without detergent  
62 and its parental mAb directly conjugated with fluorophores with 0.05% saponin on 1-mm cerebral cortex  
63 tissue sections with a 7-day incubation.  
64

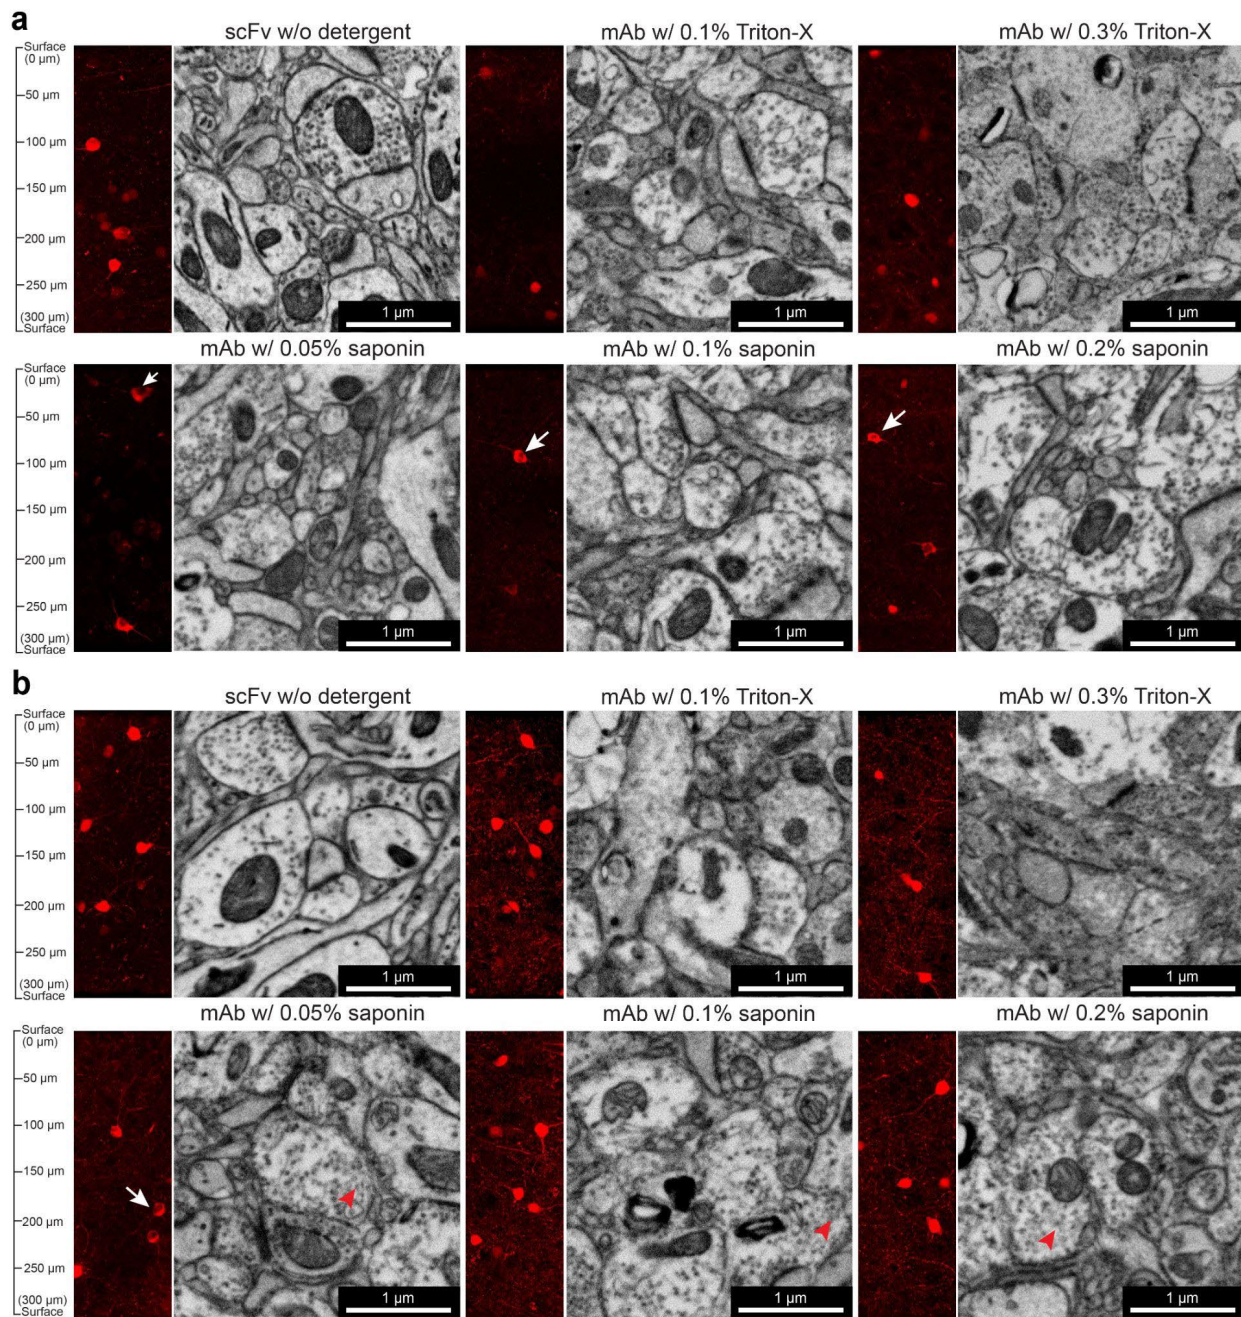

65  
66  
67  
68  
69

**Sup. Figure 5. Tissue penetration depth comparison of scFvs in the absence of detergent and fluorophore-conjugated mAbs with the treatments of various concentrations of different detergents.**

70 300- $\mu\text{m}$  cerebral cortex sections ( $n=2$  experiments in each category) were immunolabeled for one day (a)  
71 or seven days (b) with a calbindin-specific scFv conjugated with 5-TAMRA in the absence of detergent or  
72 with the scFv's parental mAb conjugated with FL550 in the presence of 0.1%, 0.3% Triton-X, or 0.05%,  
73 0,1%, 0.2% saponin. Arrows indicate unlabeled cell nuclei. Arrowheads indicate granular textures  
74 associated with the treatment of saponin. EM was performed  $n=1$  sample in each category.  
75



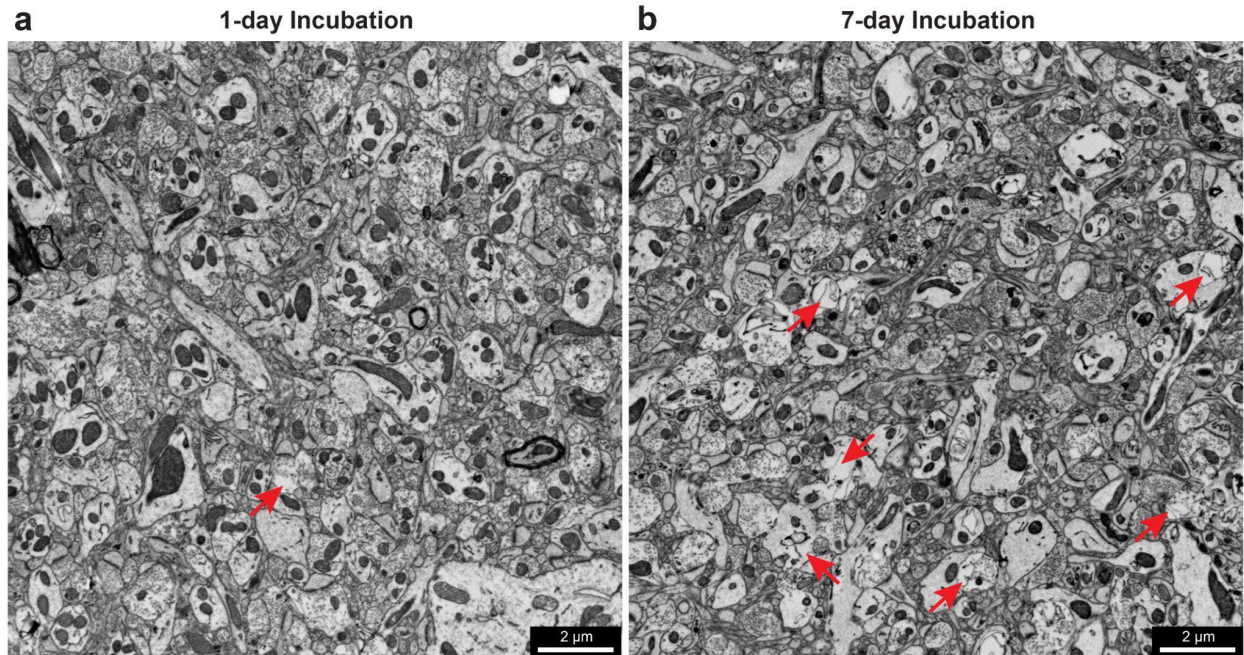

76  
77  
78  
79

**Sup. Figure 6. Ultrastructure comparison between samples incubated for one day or seven days (n=2 experiments).**

80 Ultrastructure of locations close to the surfaces of 300- $\mu\text{m}$  cerebral cortex sections immunolabeled for  
81 one day (a) or seven days (b). Arrows indicate artifacts.  
82



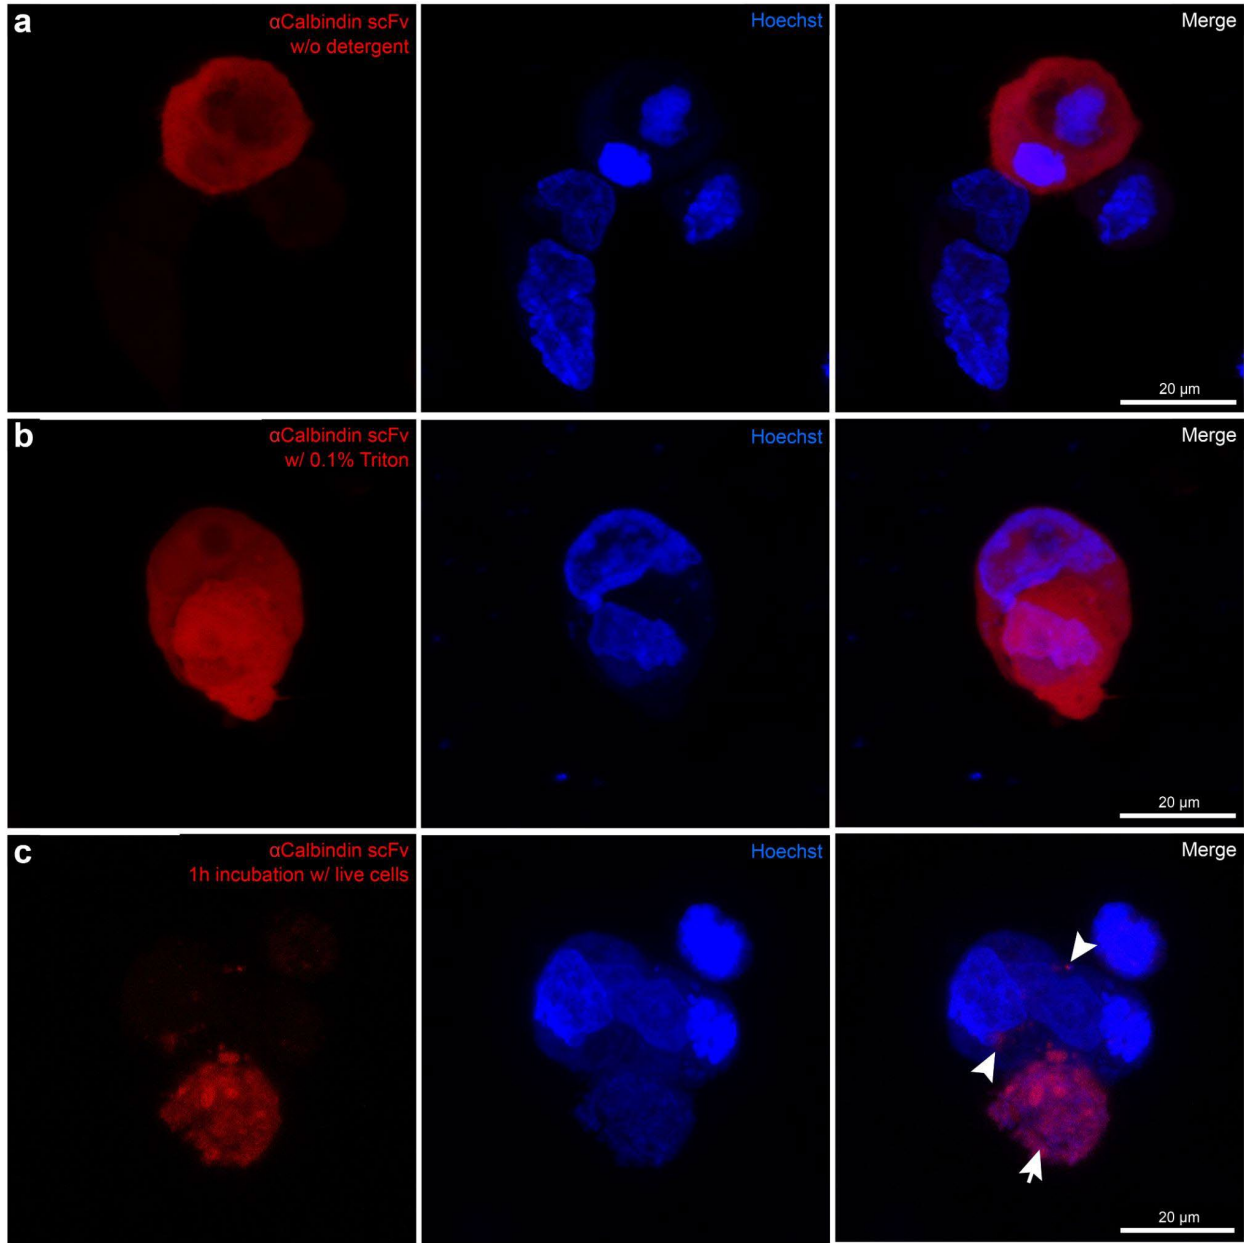

83  
84  
85  
86  
87  
88  
89  
90  
91  
92  
93

**Sup. Figure 7. Penetration of the anti-calbindin scFv into fixed HEK cells or live cells (n=3 experiments).**

Immunofluorescence immunocytochemistry on transiently transfected cells. HEK cells were transfected with a plasmid encoding Flag-tagged human calbindin. **a**, Chemically fixed cells were labeled overnight with Alexa594 anti-calbindin L109/57 scFv in the absence of detergent. **b**, Chemically fixed cells were labeled overnight with Alexa594 anti-calbindin L109/57 scFv with 0.1% Triton-X. **c**, Live cells were labeled with Alexa594 anti-calbindin L109/57 scFv. The arrow indicates the cell that has intracellular scFv labeling. Arrowheads indicate puncta labeling in other cells.

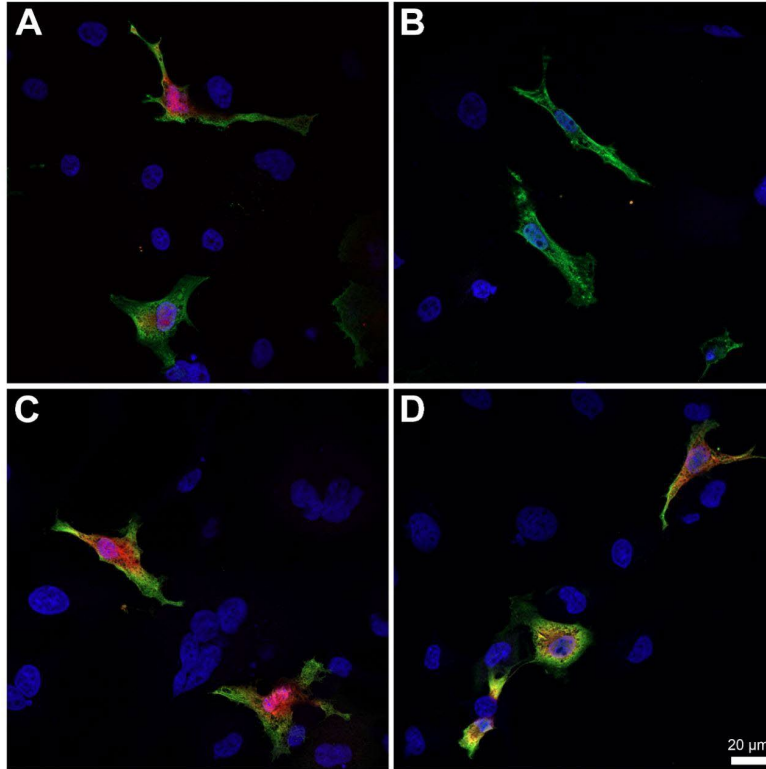

94  
95  
96

**Sup. Figure 8. Penetration of the anti-calbindin scFv into fixed COS-1 cells (n=3 experiments).**

97 Immunofluorescence immunocytochemistry on transiently transfected cells. COS-1 cells were transfected  
98 with a plasmid encoding Flag-tagged human calbindin. Cells in panels A and B were labeled for 1 hour  
99 after fixation and prior to detergent permeabilization with (A) Alexa594 anti-calbindin L109/57 scFv or (B)  
100 anti-calbindin mouse mAb L109/39 (scFv and mAb labeling in red). After permeabilization, cells were  
101 labeled with rabbit anti-Flag (green) to detect calbindin, and Hoechst nuclear dye (blue). For cells in  
102 panels C and D all immunolabeling was performed after fixation and detergent permeabilization with (C)  
103 Alexa594 anti-calbindin L109/57 scFv or (D) anti-calbindin mouse mAb L109/39 (scFv and mAb labeling  
104 in red). Cells were simultaneously labeled with rabbit anti-Flag (green), and Hoechst (blue). Cells in all  
105 panels were imaged at the same exposure.

106  
107  
108

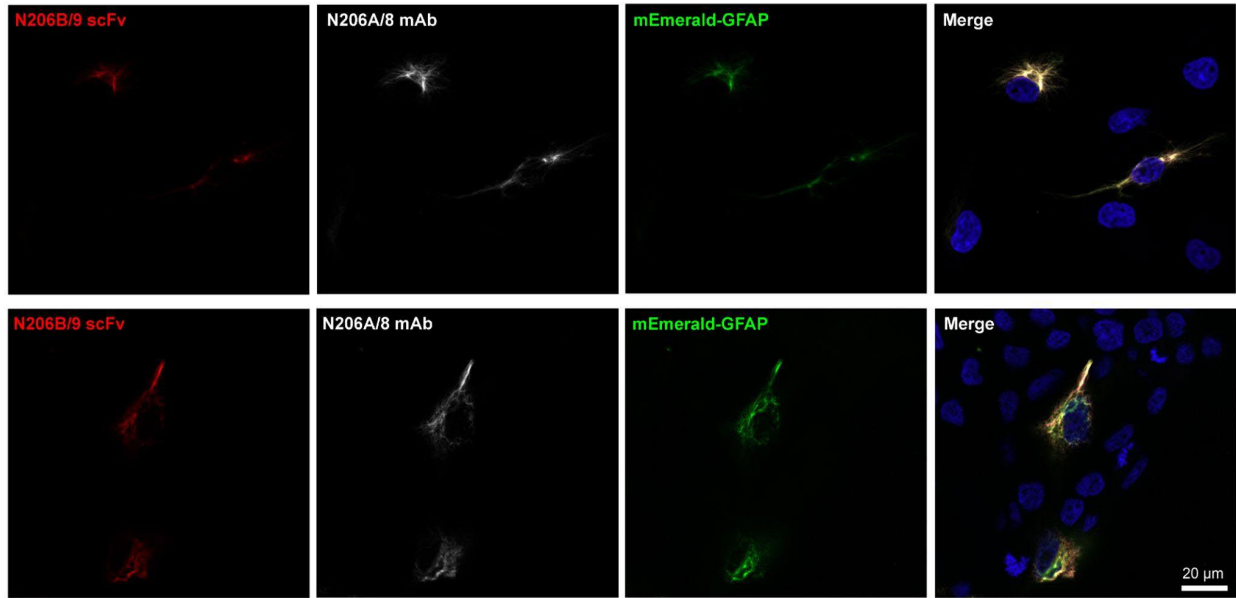

109  
 110 **Sup. Figure 9. Validation of the anti-GFAP scFv with immunofluorescence immunocytochemistry**  
 111 **(n=3 experiments).**

112 Immunofluorescence immunocytochemistry on transiently transfected cells. COS-1 cells (top row) and  
 113 HEK293T cells (bottom row). Cells were transfected with a plasmid encoding mEmerald-tagged human  
 114 GFAP (green) and double immunolabeled with the 5-TAMRA-labeled anti-GFAP N206B/9 scFv (red) and  
 115 the anti-GFAP N206A/8 mouse IgG1 mAb (white). Hoechst nuclear labeling is shown in blue.  
 116  
 117  
 118



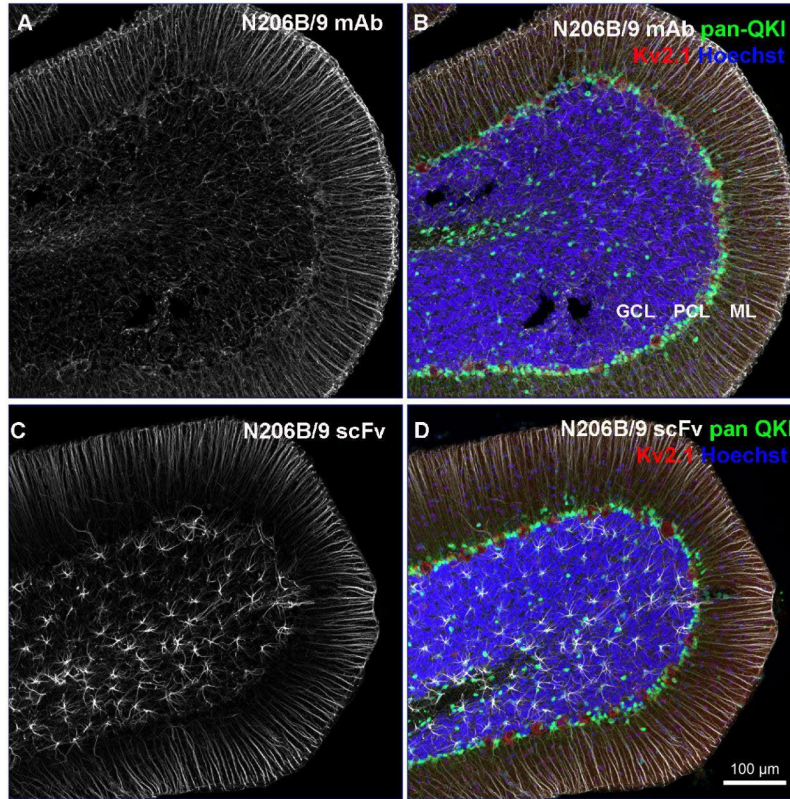

119  
120  
121

**Sup. Figure 10. Validation of the anti-GFAP scFv with immunofluorescence immunohistochemistry (cerebellum) (n=3 experiments).**

122  
123  
124  
125  
126  
127  
128  
129

GFAP scFv and the original monoclonal antibody from which it was derived display the same tissue labeling pattern of a sagittal section through the rat cerebellum. **A)** Glial cells throughout the cerebellar granule cell layer (GCL) and prominent Bergmann glial process in the molecular layer (ML) are labeled with hybridoma-derived monoclonal antibody N206B/9. **B)** merged image includes labeling with a polyclonal rabbit antibody<sup>1</sup> against the neuronal potassium channel Kv2.1, a monoclonal antibody targeting glial-specific RNA binding protein QKI (N147/6), and nuclear-specific Hoechst labeling. **C)** An adjacent section labeled with N206B/9 derived scFv shows the same pattern of labeling. **D)** merged image with the same additional labeling as B.

130

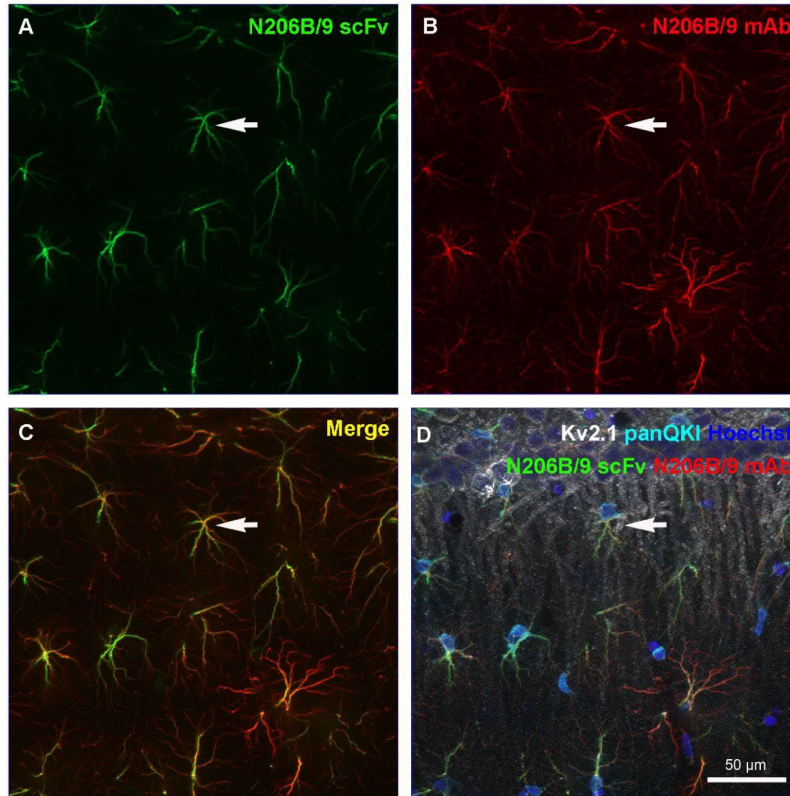

131

132 **Sup. Figure 11. Validation of the anti-GFAP scFv with immunofluorescence**  
 133 **immunohistochemistry (hippocampus) (n=3 experiments).**

134 Validation of scFv labeling pattern against the hybridoma-generated monoclonal antibody N206B/9 from  
 135 which it was derived. Multiplex immunofluorescent labeling of a sagittal section through rat hippocampal  
 136 region CA1. **A)** 5-TAMRA conjugated N206B/9 derived scFv, **B)** Hybridoma derived monoclonal antibody  
 137 N206B/9 indirectly labeled with Alexa fluor 647 conjugated goat anti-mouse IgG1 secondary antibody, **C)**  
 138 merged images from A and B illustrating co-labeled astroglial cells (e.g., arrowheads). **D)** The same  
 139 multiplex image shown in C with additional labeling for the neuronal-specific potassium channel Kv2.1,  
 140 the glial-specific pan-QKI RNA binding protein, and the DNA marker Hoechst 33342.

141

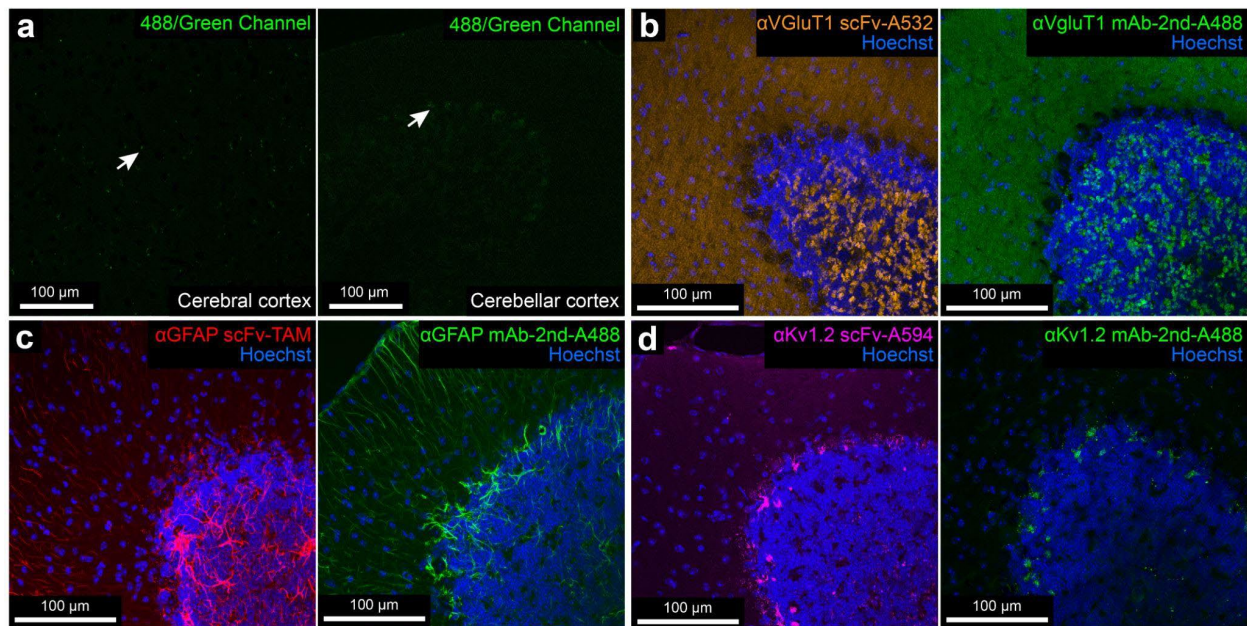

142  
143  
144  
145

**Sup. Figure 12. Validation by immunofluorescence immunohistochemistry of scFv probes and their parental mAbs (part 1).**

146 **a**, Representative confocal images (n=3 experiments) from unlabeled cerebral cortex and cerebellar  
147 cortex of a wild-type mouse showed limited background in the 488/green channel. Arrows indicate  
148 background signals from lipofuscin granules. **b-d**, Cerebellum Crus 1 sections (n=3 experiments for each  
149 category) were immunolabeled with scFvs targeting VGlut1, GFAP, and Kv1.2; or these scFvs' parental  
150 mAbs and secondary antibodies conjugated with Alexa Fluor 488.

151

152

153

154

155

156

157



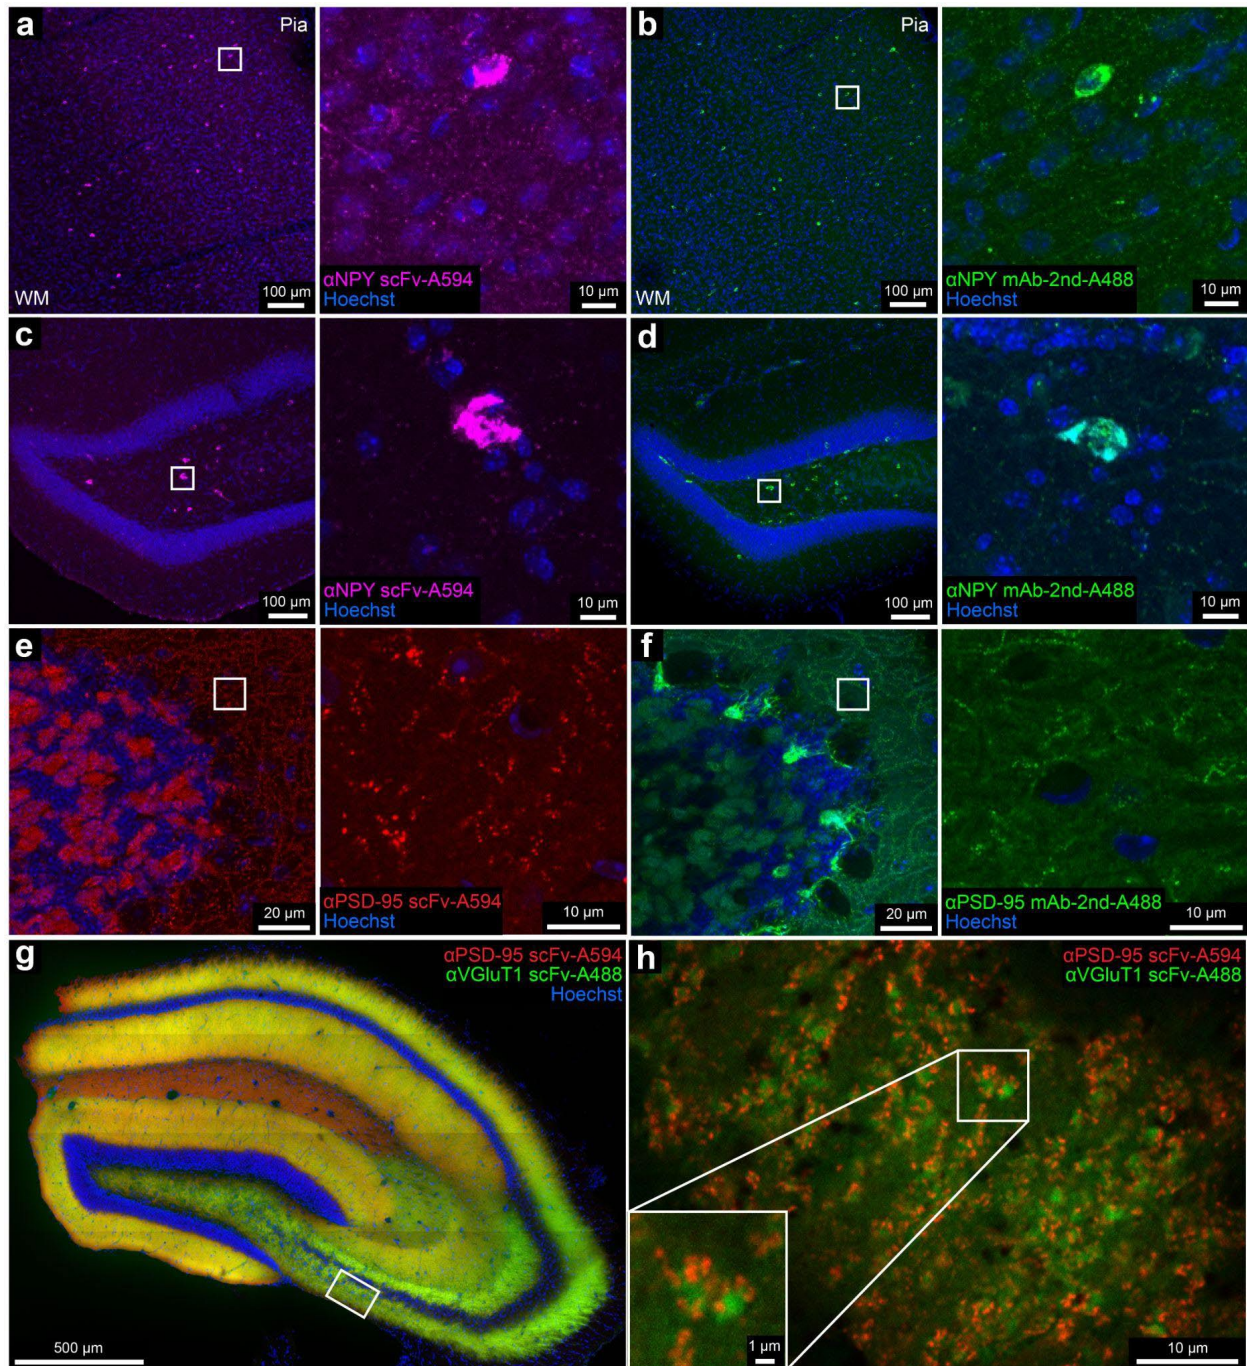

158  
159  
160  
161

**Sup. Figure 13. Validation by immunofluorescence immunohistochemistry of scFv probes and their parental mAbs (part 2).**

162 **a-f**, Representative confocal images (n=2 experiments for each category) of different sections from the  
 163 cerebral cortex (**a** and **b**), the hippocampus (**c** and **d**), or the cerebellum Crus 1 (**e** and **f**) stained with  
 164 scFvs targeting NPY or PSD-95; or their parental mAbs and secondary antibodies conjugated with Alexa  
 165 Fluor 488. The right panels in **a-f** are enlarged boxed insets from the left panels. **g** and **h**, Representative  
 166 confocal images of sections (n=2 experiments) from hippocampus stained with scFvs targeting PSD-95 or  
 167 VGLuT1. **h** is the boxed inset from **g** imaged at higher magnification. These experiments were performed

168 on samples prepared with ECS-preserving fixation protocol.

169

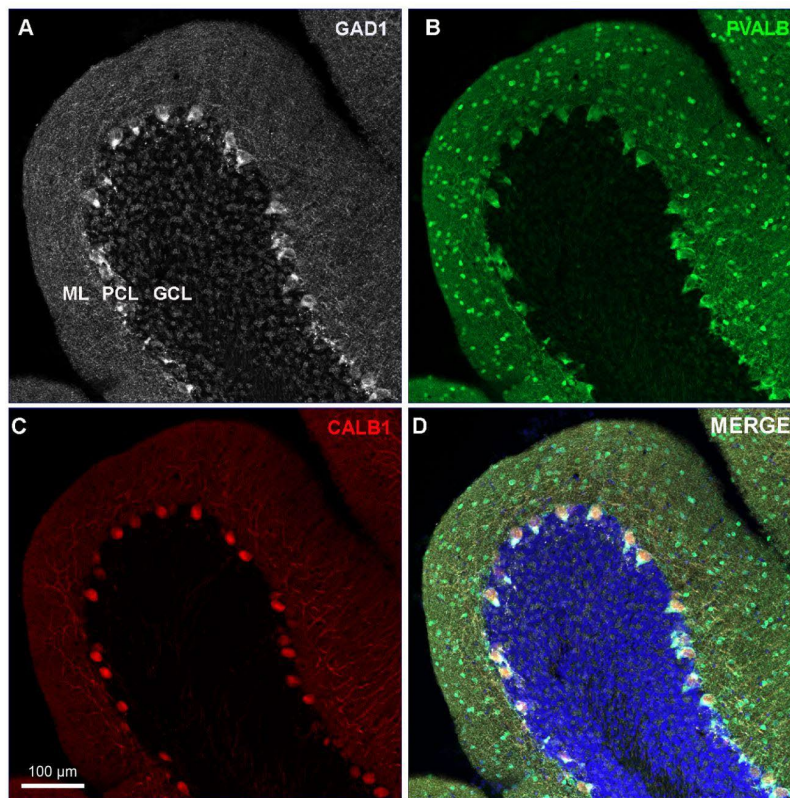

170

171 **Sup. Figure 14. Validation of the anti-calbindin and anti-parvalbumin scFvs' parental mAbs with**  
172 **Immunofluorescence immunohistochemistry. (n=3 experiments).**

173 Labeling pattern of original mAbs used to generate scFvs against parvalbumin and calbindin in rat  
174 cerebellum. Sagittal section through cerebellum labeled with monoclonal antibodies L127/8 (A, GAD1),  
175 L114/8 R (B, PARV, parvalbumin), and L109/57 (C, CALB1, calbindin). The merged image (D) shows the  
176 colocalized pattern of labeling within the Purkinje cell layer (PCL). ML, molecular layer, GCL, granule cell  
177 layer.

178

179



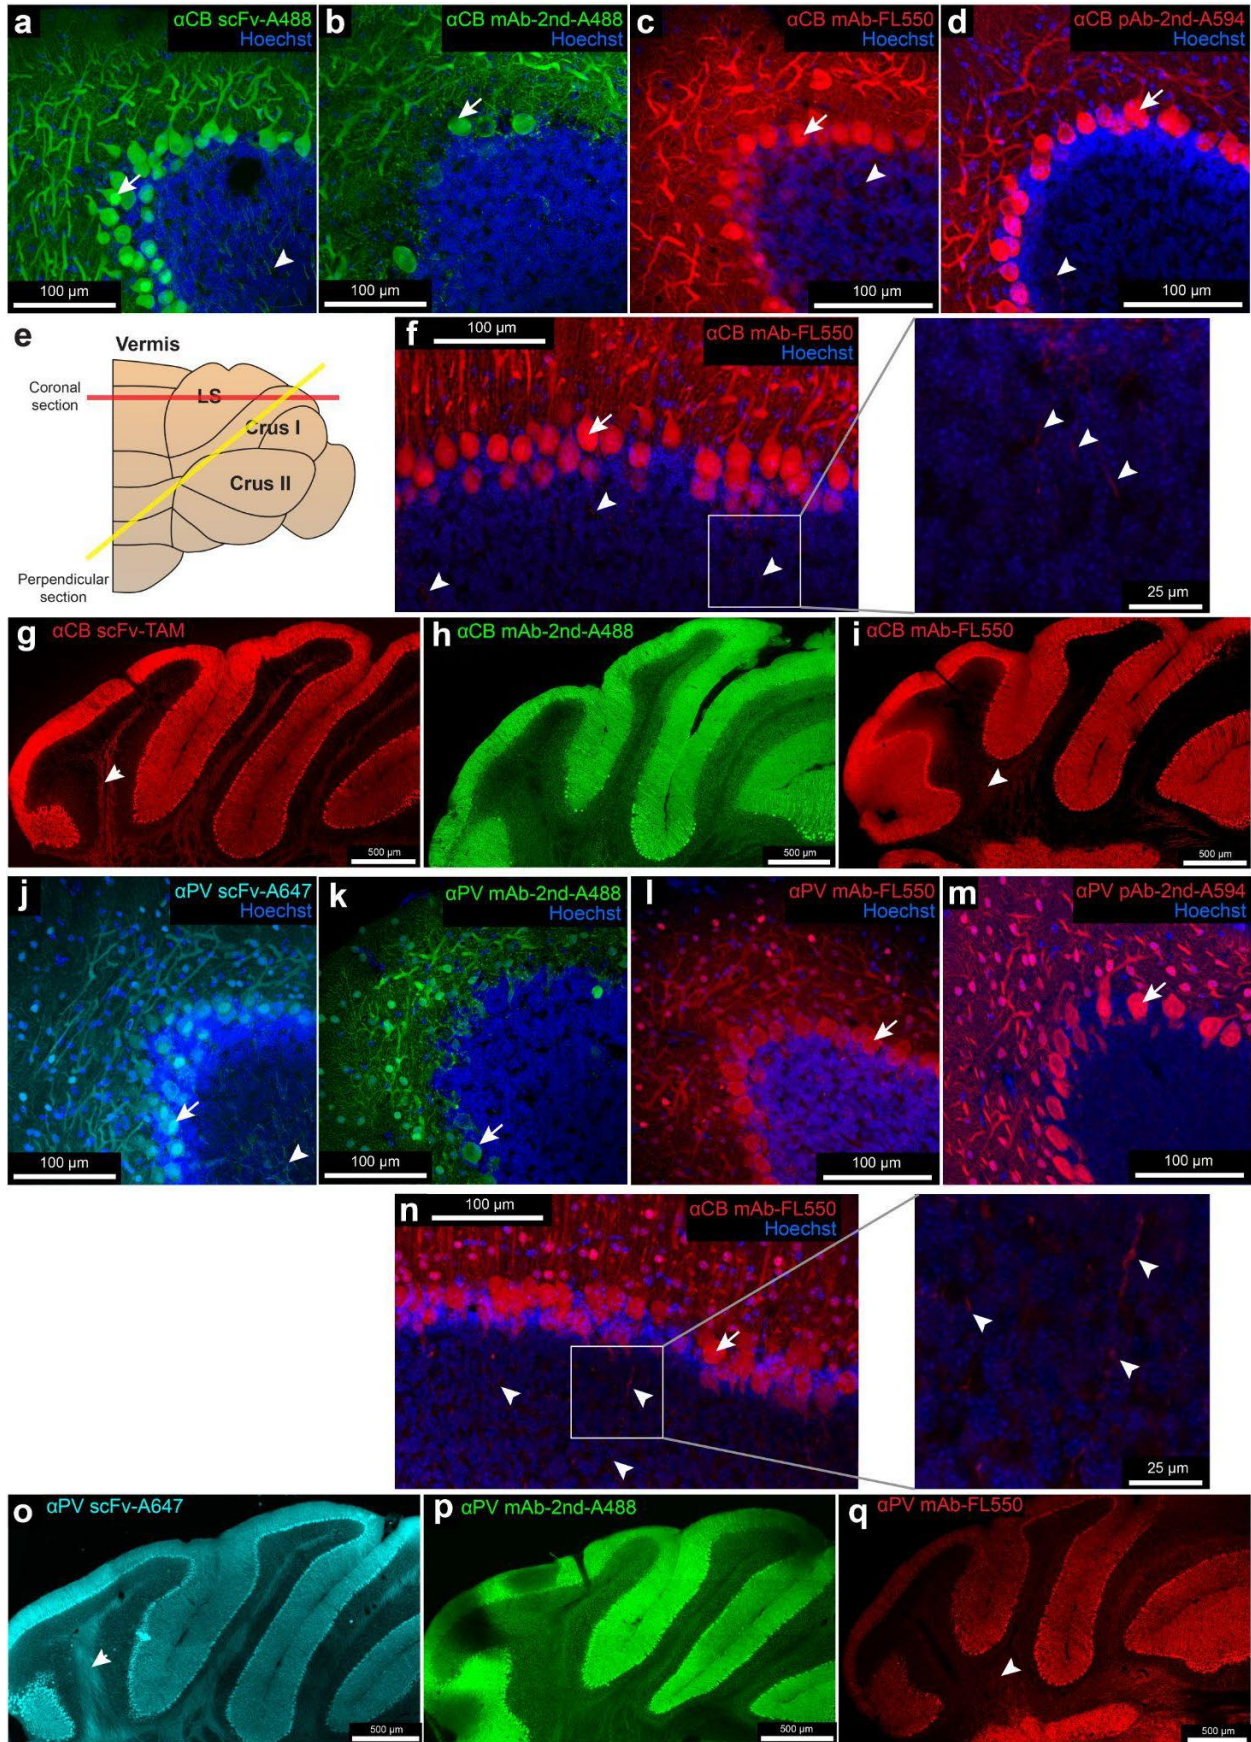



181 **Sup. Figure 15. Validation of immunofluorescence immunohistochemistry by scFv probes and**  
182 **their parental mAbs (part 3).**

183 Cerebellum Crus 1 sections were immunolabeled with a calbindin-specific scFv (**a**), or its parental mAb  
184 and secondary antibody conjugated with Alexa Fluor 488 (**b**), the mAb conjugated with FL550 (**c**), or a  
185 commercial calbindin-specific pAb and secondary (Fab)<sub>2</sub> conjugated with Alexa Fluor 594 (**d**). **e**,  
186 Schematics showing the cutting orientation that is parallel to the lobule of Crus 1, which intersects  
187 perpendicular to the planer Purkinje cells in Crus 1. **f**, Sections cut in this orientation immunolabeled with  
188 the mAb conjugated with FL550. The boxed inset is shown enlarged in the adjacent panel. Whole-section  
189 images of cerebellum Crus 1 sections immunolabeled with a calbindin-specific scFv (**g**), or its parental  
190 mAb and secondary antibody conjugated with Alexa Fluor 488 (**h**), or the mAb conjugated with FL550 (**i**).  
191 Arrows indicate labeled cell nuclei of Purkinje cells. Arrowheads indicate the labeled axons. n=3  
192 experiments for **a-b**; CB, calbindin; n=2 experiments for **c-d**, **f-i**.

193  
194 Cerebellum Crus 1 sections were immunolabeled with a parvalbumin-specific scFv (**j**), or its parental mAb  
195 and secondary antibody conjugated with Alexa Fluor 488 (**k**), the mAb conjugated with FL550 (**l**), or a  
196 commercial parvalbumin-specific pAb and secondary (Fab)<sub>2</sub> conjugated with Alexa Fluor 594 (**m**). **n**,  
197 Sections cut in this orientation in **e** immunolabeled with the mAb conjugated with FL550. The boxed inset  
198 is shown enlarged in the adjacent panel. Whole-section images of cerebellum Crus 1 sections  
199 immunolabeled with a parvalbumin-specific scFv (**o**), or its parental mAb and secondary antibody  
200 conjugated with Alexa Fluor 488 (**p**), or the mAb conjugated with FL550 (**q**). Arrows indicate labeled cell  
201 nuclei of Purkinje cells. Arrowheads indicate the labeled axons; PV, parvalbumin; n=3 experiments for **j-k**;  
202 n=2 experiments for **l-q**.

203  
204  
205  
206  
207  
208  
209

a

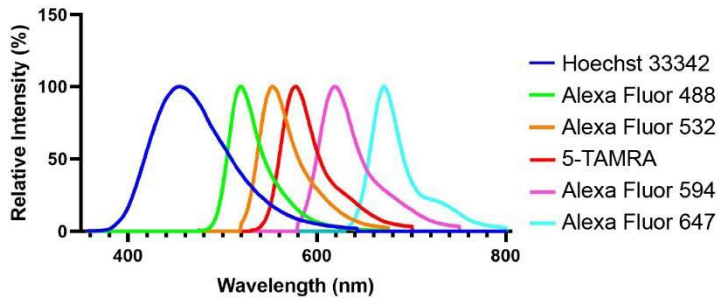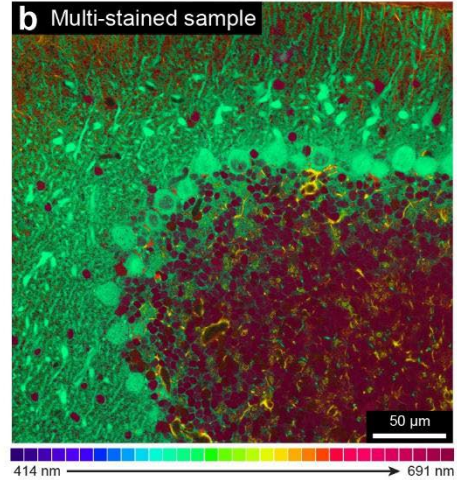

c

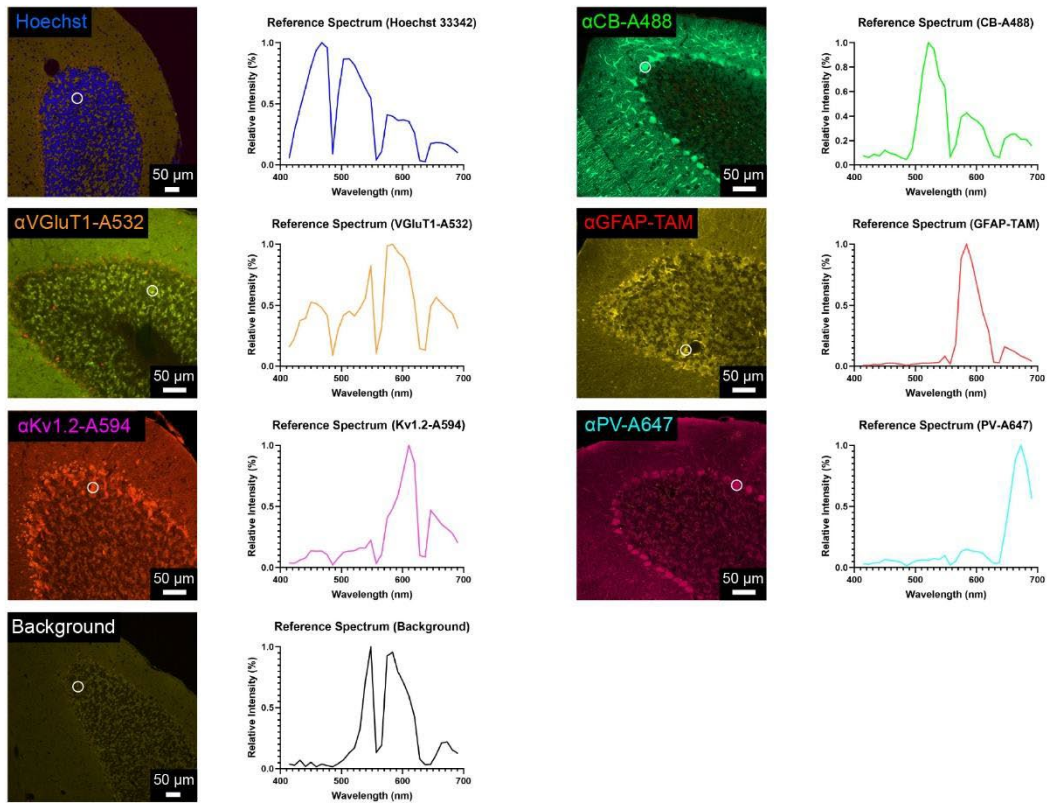

210

211 **Sup. Figure 16. Technical details of linear unmixing.**

212 **a**, The excitation and emission spectra of the six fluorescent dyes used in the multi-scFv labeling. **b**, An  
 213 image slice from the lambda stack of the multicolor sample with a depth of 52 μm. The 32 channels (from  
 214 414 nm to 691 nm) in the lambda mode were labeled with different colors. **c**, the lambda stacks acquired  
 215 from the individually labeled samples. The reference spectrum for each dye was extracted from the pixels  
 216 labeled by the white circle in each lambda stack image.

217

**a** Unmixing results from reference spectra acquired from individually stained samples

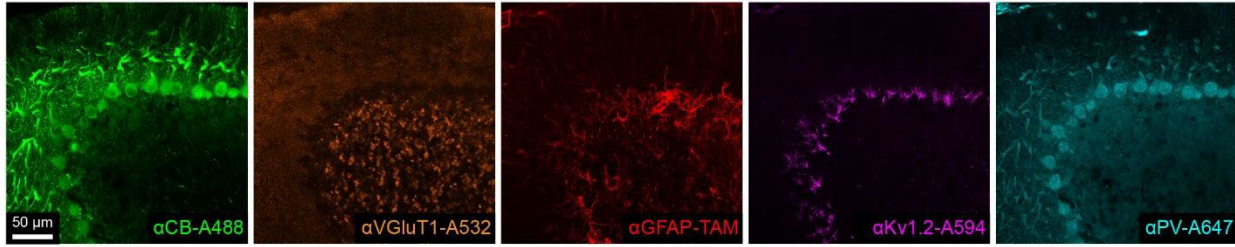

**b** Unmixing results from reference spectra automatically extracted from co-stained sample

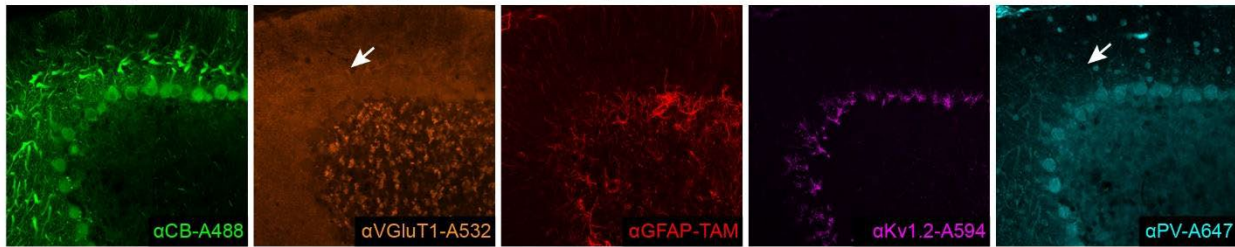

**c** Unmixing results from reference spectra manually extracted from co-stained sample

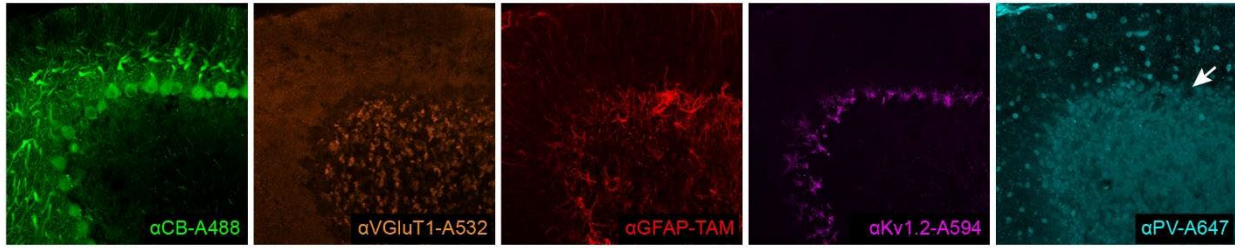

218

219 **Sup. Figure 17. Comparison of linear unmixing results using reference spectra extracted in three**  
220 **different ways.**

221 White arrows in **b** indicate the fluorescence signals that should be in the Alexa Fluor 647 channel, which  
222 were separated into the Alexa Fluor 532 channel instead. White arrows in **c** indicate where the  
223 fluorescence signals from the Purkinje cell bodies were missing in the Alexa Fluor 647 channel.  
224

225



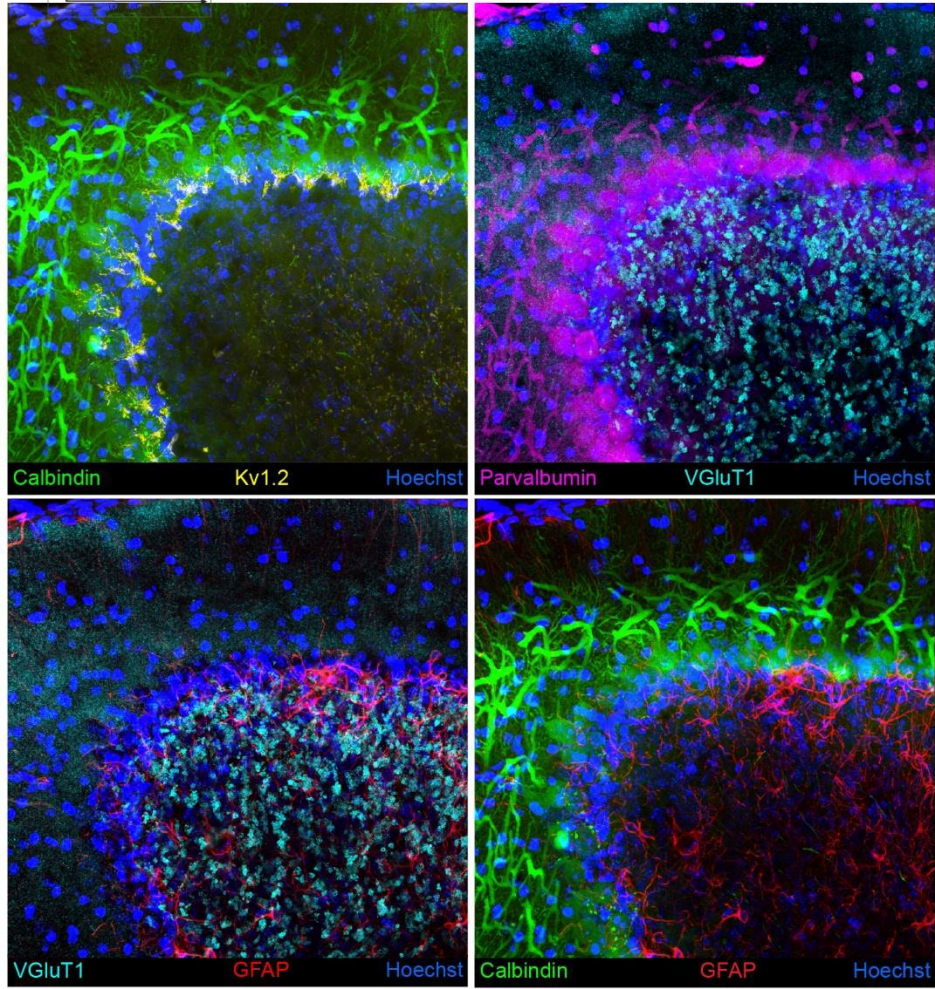

226

227

228

229

**Sup. Figure 18. Three-channel maximum intensity projection images of the multi-color confocal fluorescence image stack in Figure 2 c.**



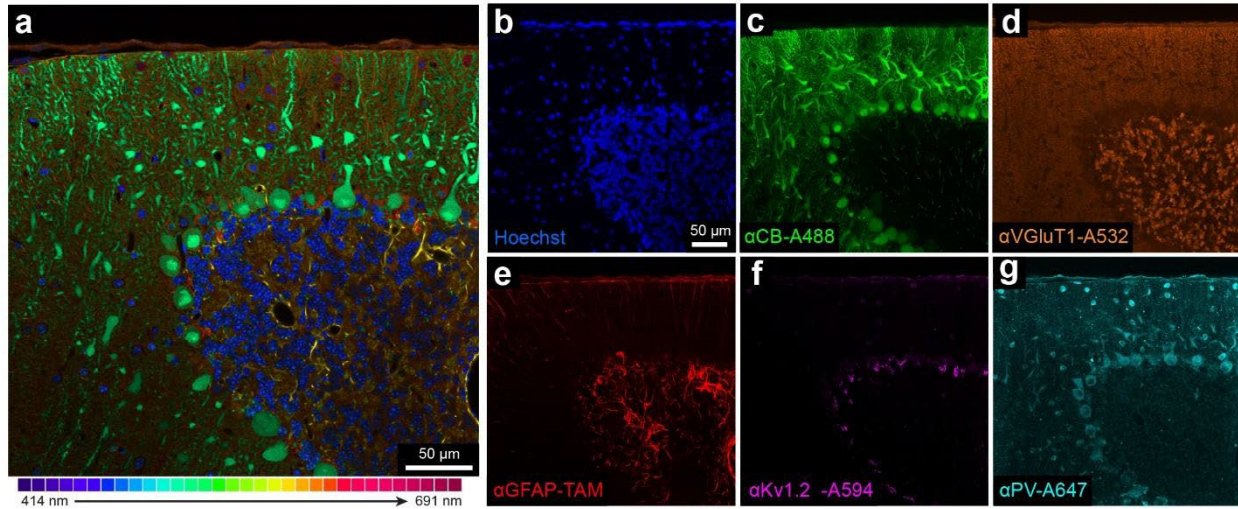

230

231 **Sup. Figure 19. The results of combining the Hoechst channel into linear unmixing of confocal**  
 232 **micrographs (n=1 experiment).**

233 **a**, An image slice from the lambda stack of the multicolor sample with a depth of 49 μm. The 32 channels  
 234 (from 414 nm to 691 nm) in the lambda mode were labeled with different colors. **b-g**, the linear unmixing  
 235 results of the six channels (Hoechst, Alexa Fluor 488, Alexa Fluor 532, 5-TAMRA, Alexa Fluor 594, Alexa  
 236 Fluor 647).  
 237

238

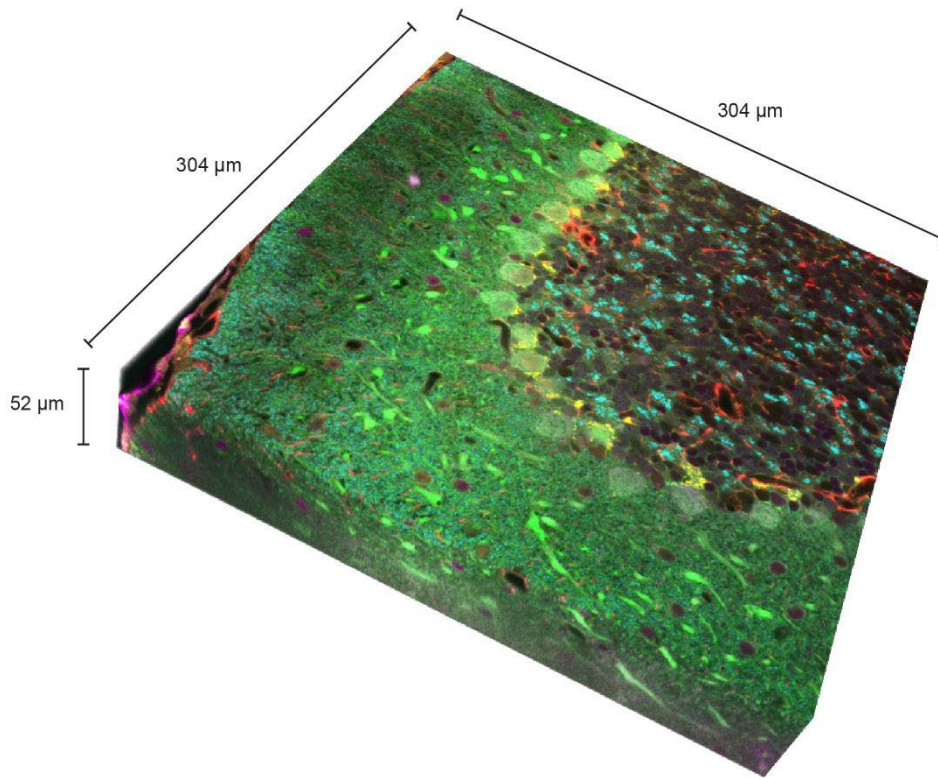

239

240 **Sup. Figure 20. The dimensions of the multi-color confocal fluorescence image volume acquired**  
241 **by scFv-enabled immunofluorescence and linear unmixing (n=1 experiment).**

242



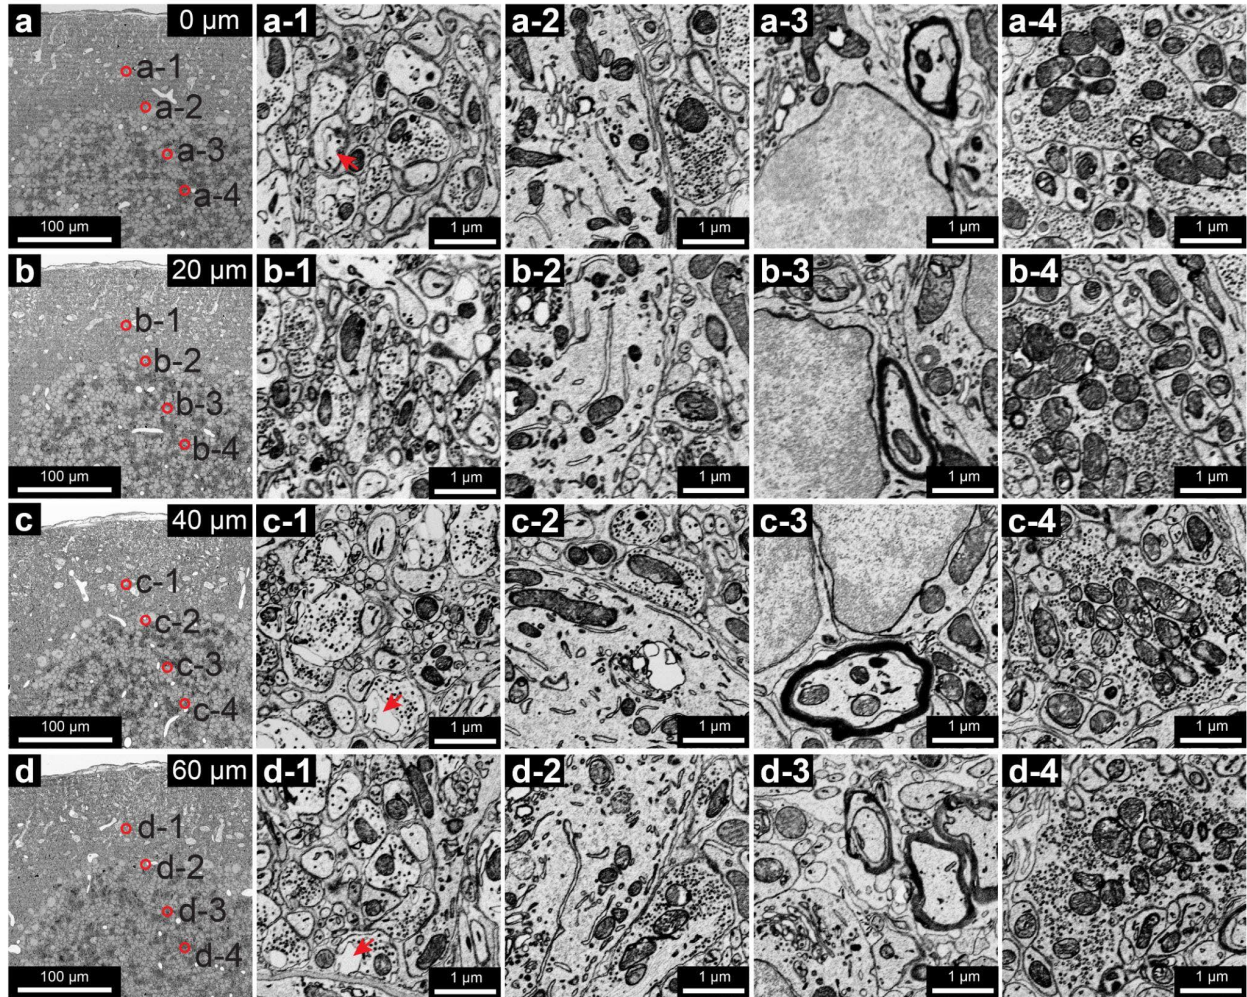

243

244 **Sup. Figure 21. Well-preserved ultrastructure from the surface (a) to the middle (d) of the 120-μm**  
 245 **section (n=2 experiments).**

246 Panels **1-4** in **a-d** show the ultrastructure at the locations labeled by the red circles in the right panels. 0,  
 247 20, 40, 60-μm in each panel means the distance of the ultrathin section from the surface of the tissue  
 248 section. Arrows indicate the artifacts potentially caused by prolonged incubation with scFvs for  
 249 immunolabeling.  
 250



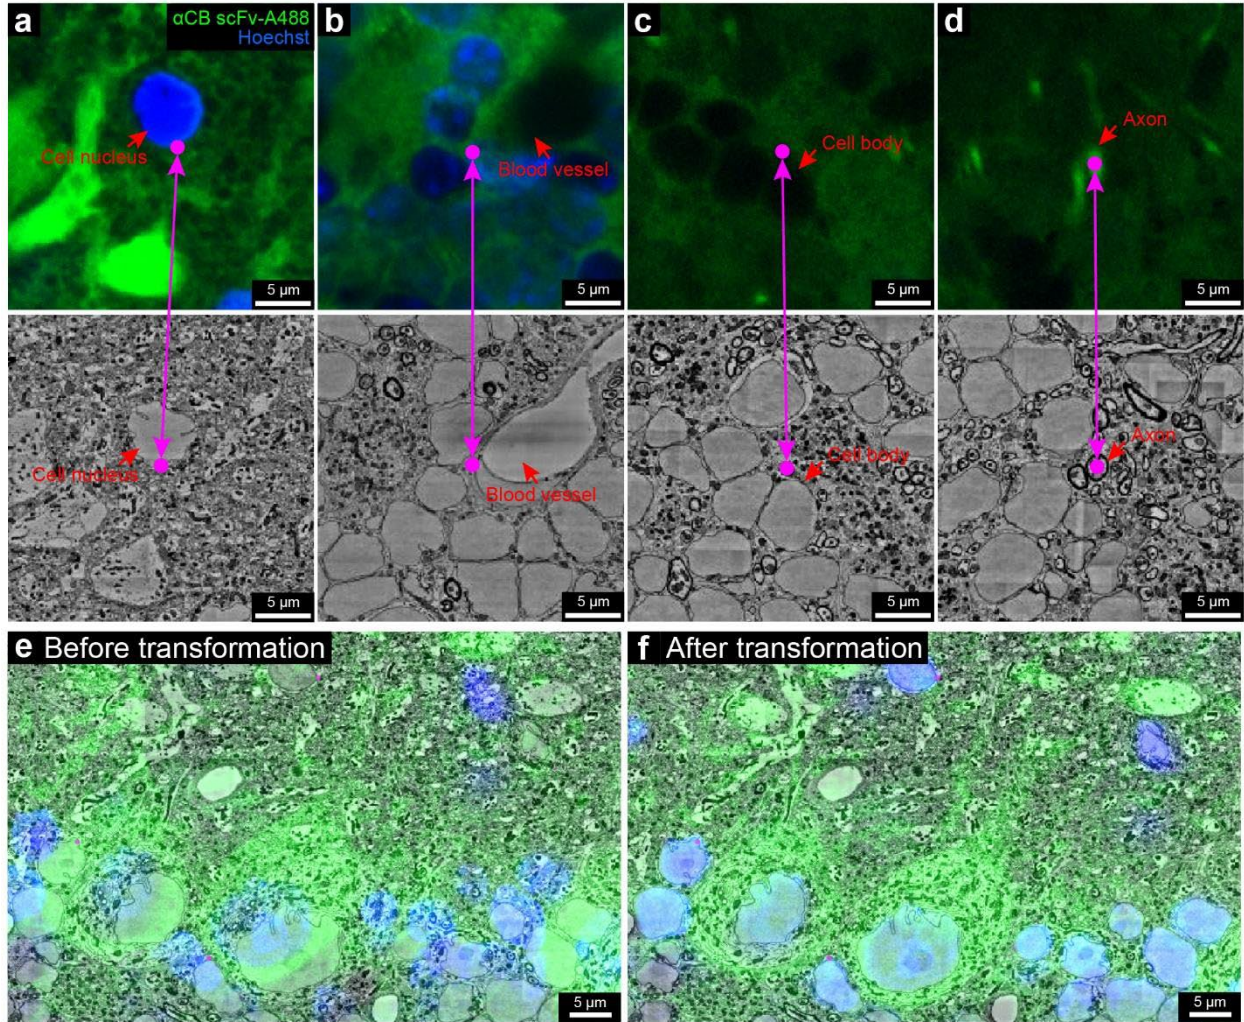

251

252 **Sup. Figure 22. Co-registration between fluorescence image volume and the high-resolution EM**  
 253 **volume (n=1 experiment).**

254 **a-d**, landmark points that corresponded to the same sites in the two volumes were placed on blood  
 255 vessels, cell nuclei, cell bodies, and axons. **e-f** show the overlays between the fluorescence image and  
 256 the EM image before and after the transformation of the fluorescence image volume was performed  
 257 based on the point correspondences.  
 258



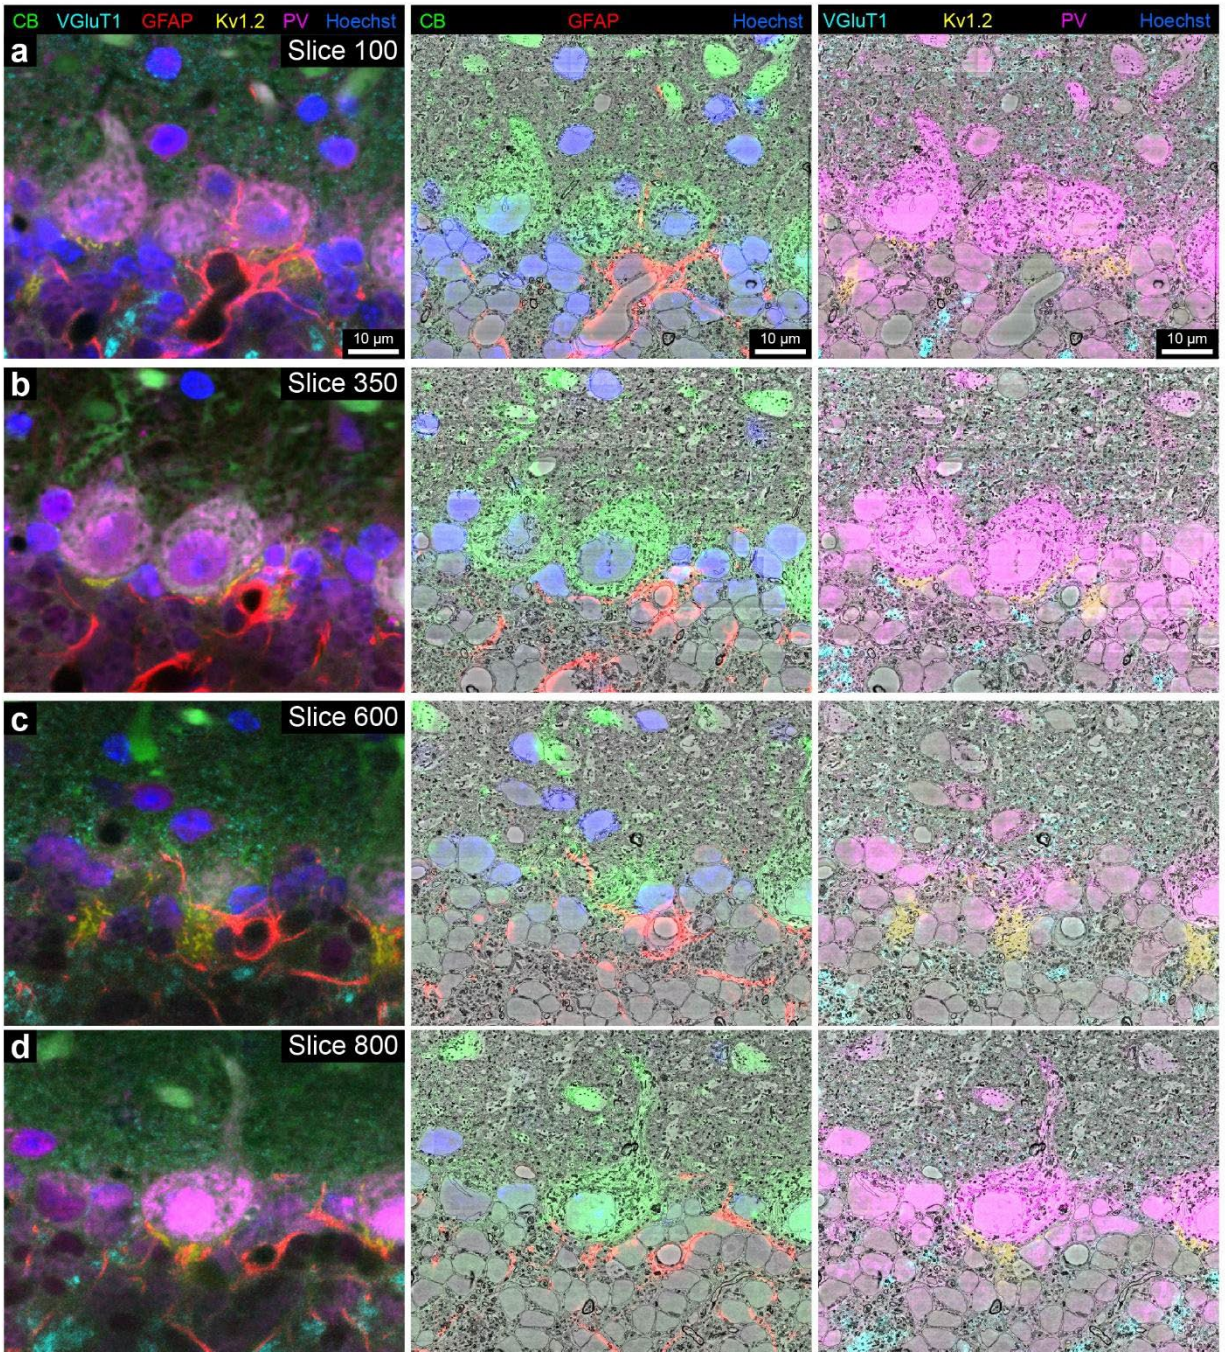

259

260  
261

**Sup. Figure 23. Demonstration of the overlay between fluorescence signals and EM ultrastructure throughout the vCLEM dataset (n=848 slices).**



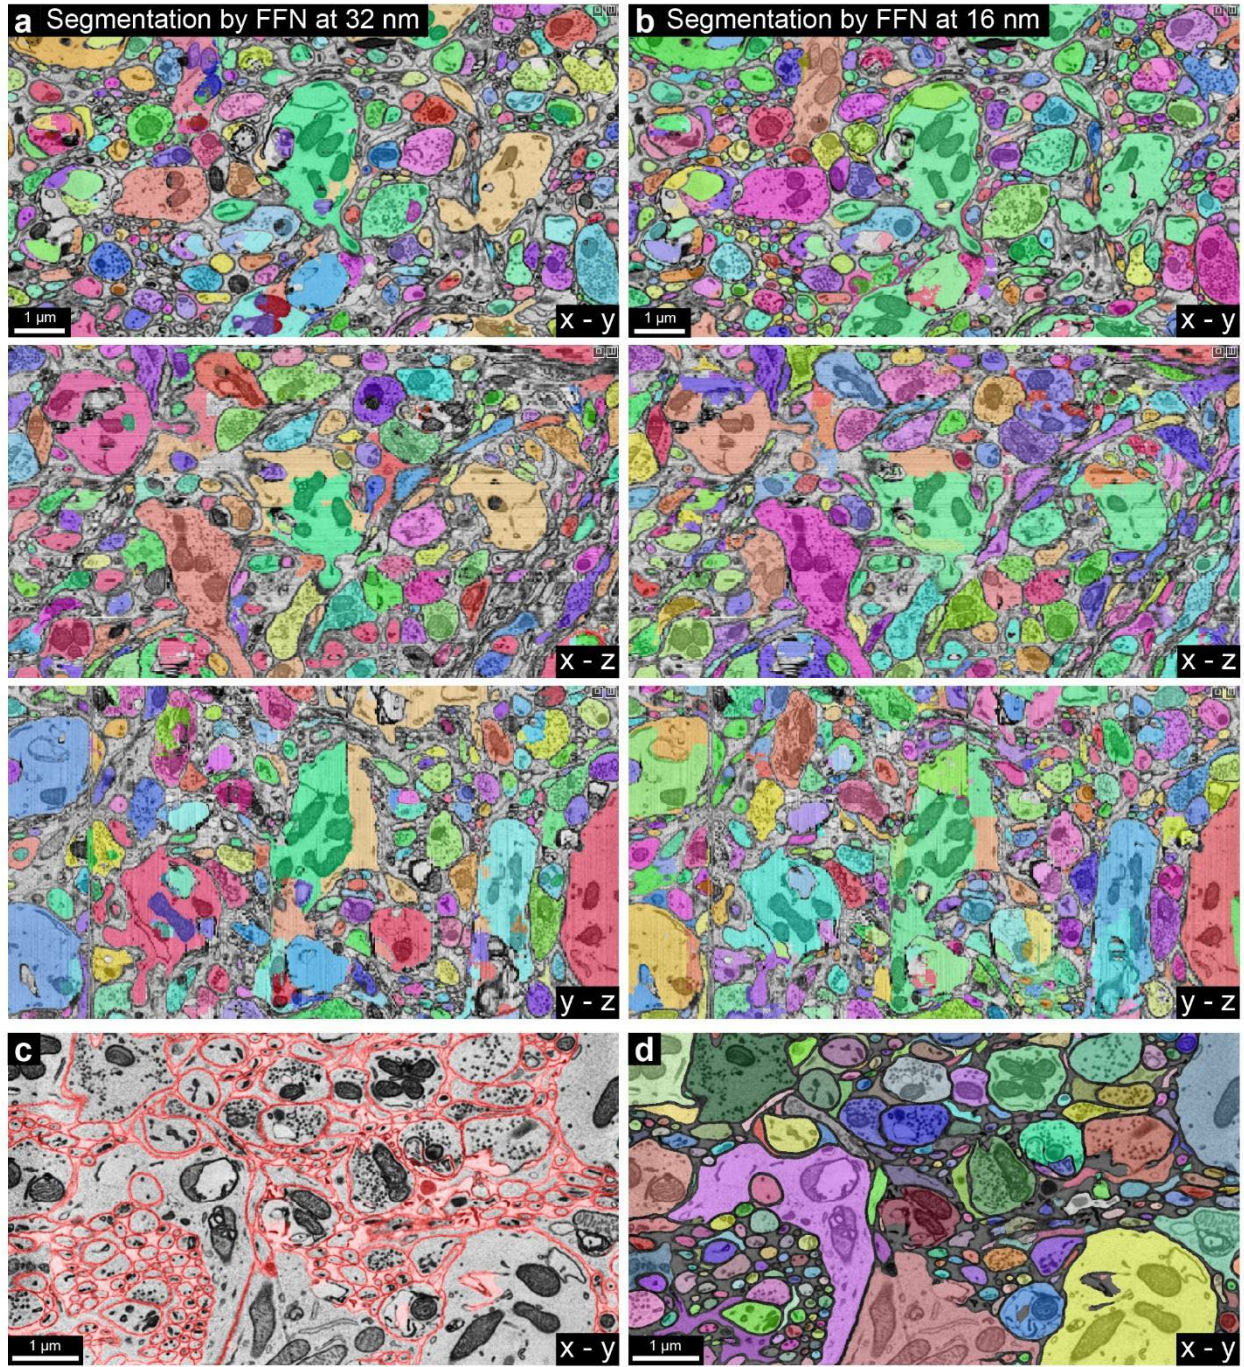

262  
263

264  
265  
266



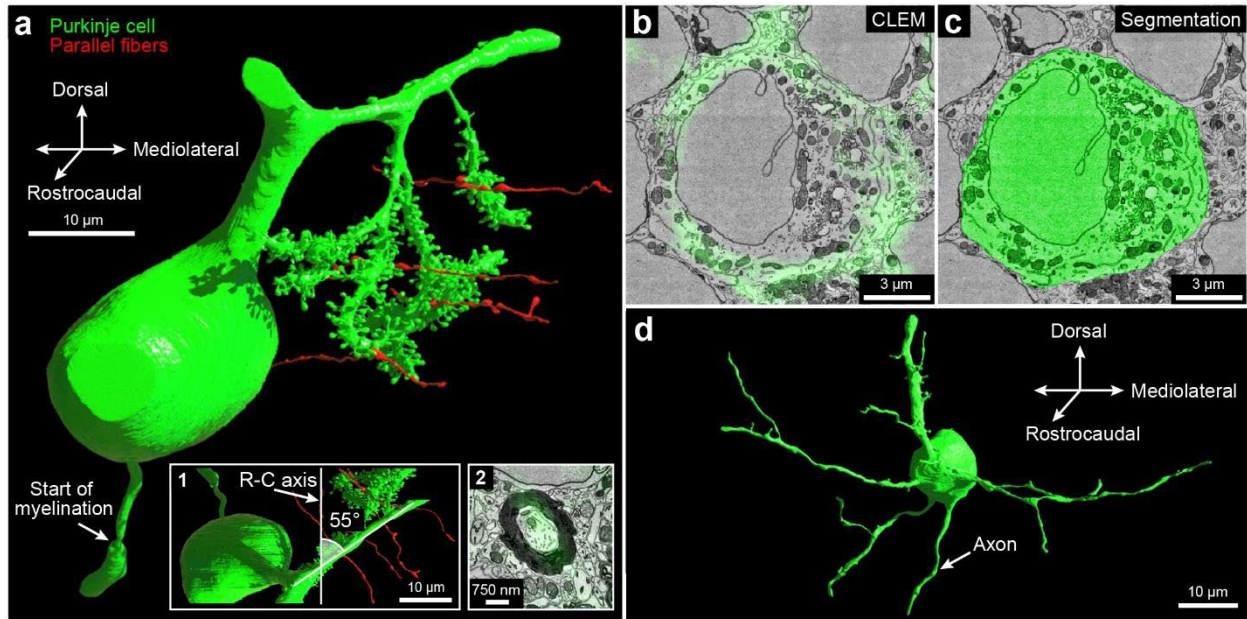

267

268 **Sup. Figure 25. 3D reconstruction of cells labeled by the calbindin-specific scFv probe.**

269 **a**, 3D reconstruction of the Purkinje cell (n=1) labeled in Figure 4 a (green) and four parallel fibers (red)  
 270 that made synapses on the Purkinje cell. Inset **1**, the reconstructed Purkinje cell is viewed in the  
 271 rostrocaudal-mediolateral plane. The dendritic tree of this Purkinje cell was not perpendicular to the  
 272 rostral-caudal axis but intersected at the axis at an angle of around 55°. Inset **2**, the 2D CLEM image  
 273 showing the fluorescence signal (green) of the calbindin-specific scFv probe overlaps with a heavily  
 274 myelinated axon. **b**, the 2D CLEM image showing the fluorescence signal (green) of the calbindin-specific  
 275 scFv probe overlaps with a Golgi cell (n=1). **c**, EM image showing the 2D segmentation (green) of the  
 276 calbindin-positive Golgi cell based on staining shown in **b** (n=1). **d**, 3D reconstruction of the Golgi cell  
 277 labeled in **b** (n=1).  
 278



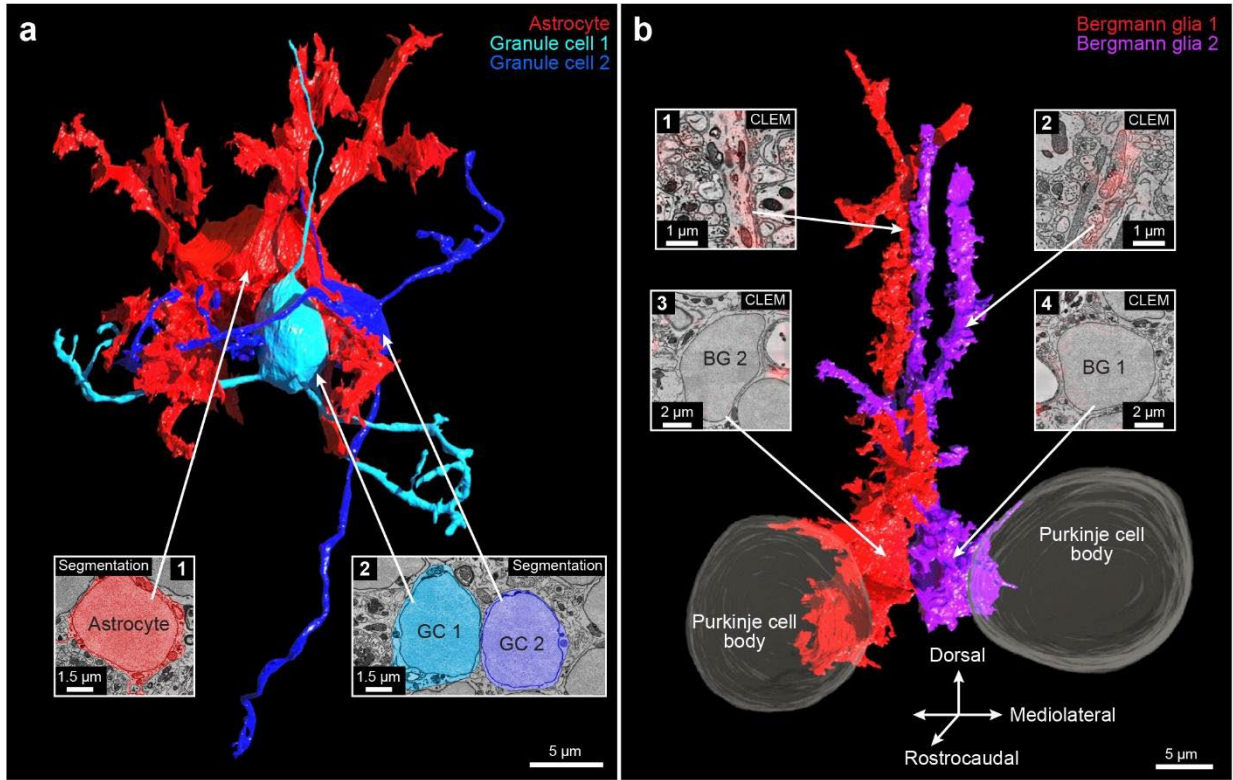

279

280 **Sup. Figure 26. 3D reconstruction of cells labeled by the GFAP-specific scFv probe.**

281 **a**, 3D reconstruction of the astrocyte labeled in Figure 4 e (red) (n=1) and two nearby granule cells (cyan  
 282 and blue) (n=2). Insets, EM image showing the 2D segmentations of the cell bodies of the reconstructed  
 283 astrocyte and granule cells. **b**, 3D reconstruction of the two labeled Bergmann glia labeled in Figure 4 k  
 284 (n=2) (red) and two nearby Purkinje cells (n=2). Insets **1** and **2**, the 2D CLEM images showing the  
 285 fluorescence signal (red) of the GFAP-specific scFv probe overlap with the processes of the Bergmann  
 286 glia. In insets **3** and **4**, the 2D CLEM images showing the fluorescence signal (red) of the GFAP-specific  
 287 scFv probe do not overlap with the cell bodies of the Bergmann glia.  
 288

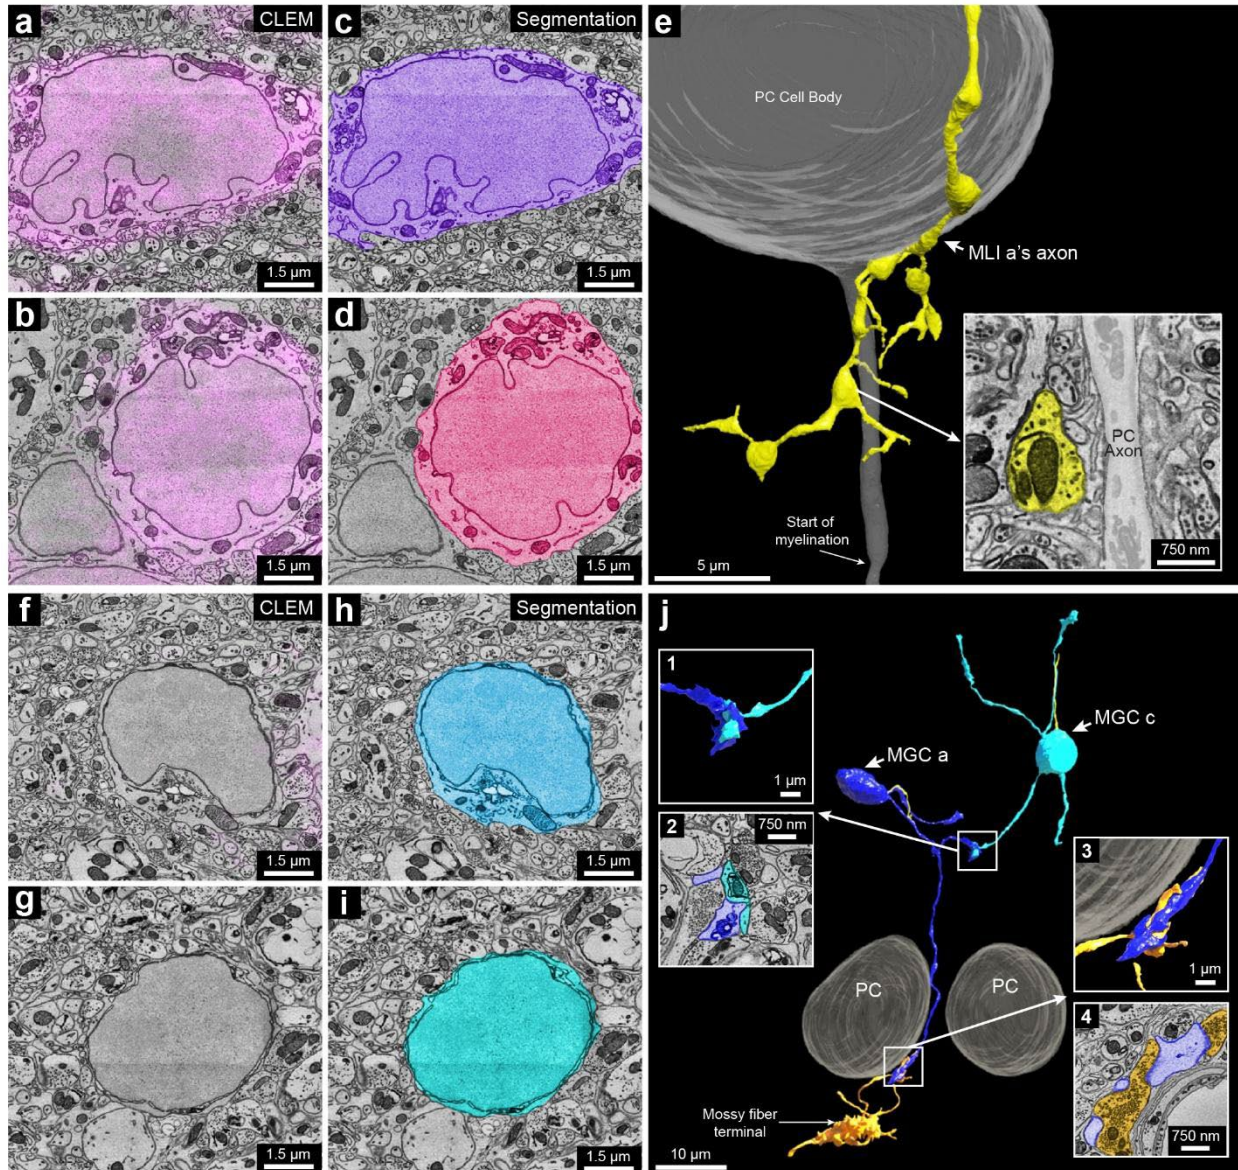

289

290 **Sup. Figure 27. 3D reconstruction of the molecular layer interneurons and granule cells.**

291 **a-b**, Representative 2D CLEM image (n=22) showing the fluorescence signals (magenta) of the  
 292 parvalbumin-specific scFv probe overlap cell bodies of MLI b and c. **b-d**, EM image showing the 2D  
 293 segmentation (purple and magenta) of MLI b and (n=2). **e**, the axon of MLI a was part of the pinceau  
 294 structure that surrounds a Purkinje cell's axon initial segment (inset) (n=1). **f-g**, Representative 2D CLEM  
 295 image (n=7) showing the fluorescence signals (magenta) of the parvalbumin-specific scFv probe do not  
 296 overlap cell bodies of MGC b and c. **h-i**, EM image showing the 2D segmentation (blue and cyan) of MGC  
 297 b and c (n=2). **j**, 3D reconstruction MGC a and MGC c (n=2). These two cells formed a glomerulus (insets  
 298 **1** and **2**) (n=1). MGC a received synaptic input from a mossy fiber terminal (insets **3** and **4**) (n=1).  
 299

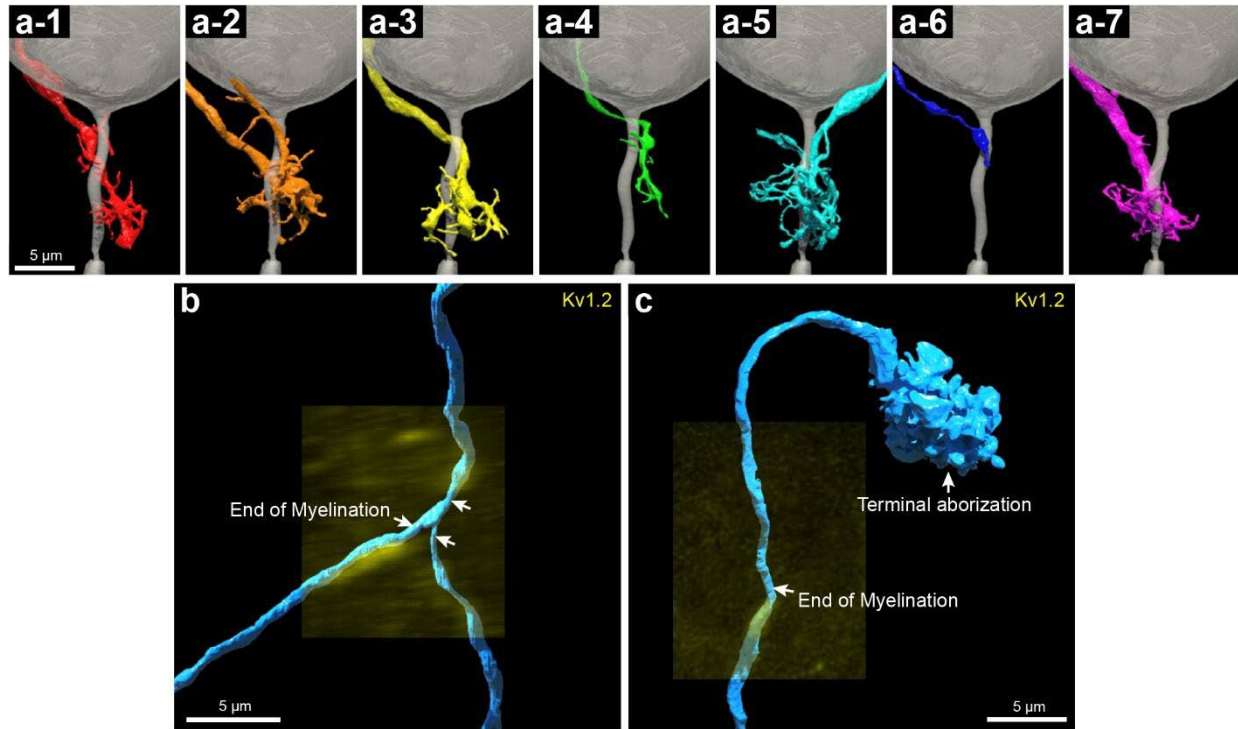

300

301 **Sup. Figure 28. 3D reconstruction of axonal terminals in a pinceau and the mossy fibers labeled**  
 302 **with the Kv1.2-specific scFv.**

303 **a-1 to a-7**, seven individual axon terminals (n=7) labeled by the Kv1.2-specific scFv probe at the pinceau  
 304 structure in Figure 6 a-c. **b**, Representative 3D reconstruction of an axon with Kv1.2 positive  
 305 juxtapanodal labeling (yellow fluorescence) at a branching point (n=2). **c**, Representative 3D  
 306 reconstruction of an axon with Kv1.2 positive juxtapanodal labeling (yellow fluorescence) at the site  
 307 where the myelination ended (n=5). This axon ended in a terminal axonal arborization (arrow) in the  
 308 granule cell layer.  
 309

310



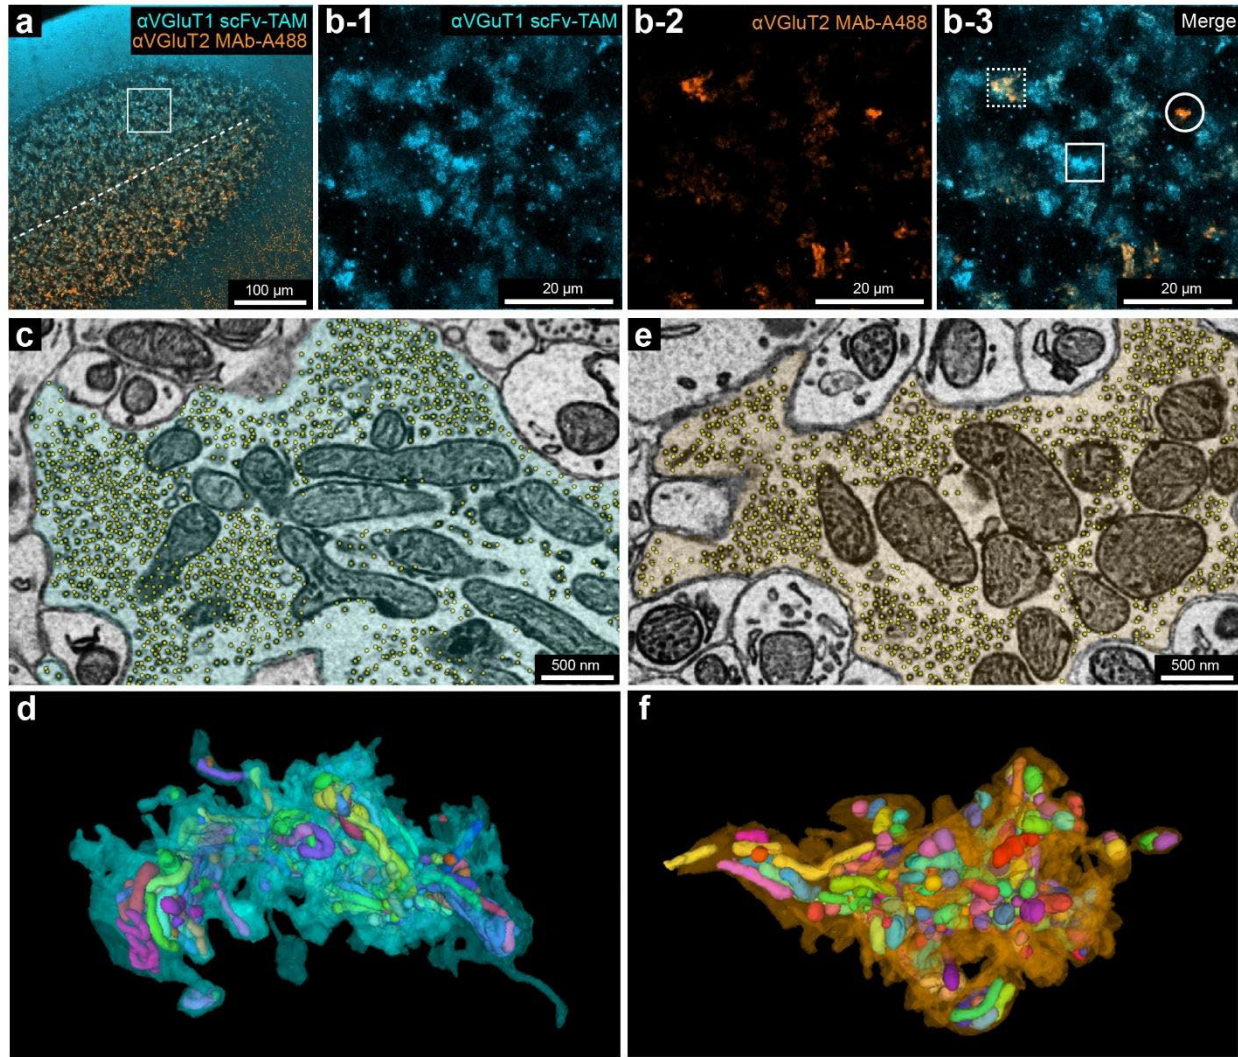

311

312 **Sup. Figure 29. Three types of mossy fiber terminals identified by double immunofluorescence of**  
 313 **VGLUT1/2 and synaptic vesicle and mitochondria detection results.**

314 **a**, Representative confocal image (n=3 experiments) of a section from the cerebellum Crus 1 stained with  
 315 a VGLUT1-specific scFv probe conjugated with Alexa Fluor 5-TAMRA and a VGLUT2-specific scFv probe  
 316 with secondary antibodies conjugated with Alexa Fluor 488. The image was pseudo-colored. Note the  
 317 labeling of VGLUT1 was stronger than the labeling of VGLUT2 on the left side of the dotted line and vice  
 318 versa. **b-1 to b-3**, Single-channel and two-channel images enlarged from the boxed inset in **a**. The box  
 319 with solid lines indicates a VGLUT1 positive terminal. The box with dotted lines indicates a VGLUT1/2  
 320 double positive terminal. The circle indicates a VGLUT2 positive terminal. **c-d**, Representative synaptic  
 321 vesicle and mitochondria detection results from a reconstructed VGLUT1 positive terminal (n=10). Colored  
 322 objects inside the transparent terminal are the detected mitochondria. **e-f**, Representative synaptic  
 323 vesicle and mitochondria detection results from a reconstructed VGLUT1 negative terminal (n=10). Colored  
 324 objects inside the transparent terminal are the detected mitochondria.  
 325

326

327

328  
329

**Sup. Table 1. The final concentrations of scFv and nanobody probes used in the immunofluorescence of this work.**

| Target         | Clone No.        | Fluorescent dyes conjugated | Final conc. |
|----------------|------------------|-----------------------------|-------------|
| GFP (scFv)     | N86/38           | 5-TAMRA                     | 0.01 mg/ml  |
| GFP (nanobody) | Enh <sup>4</sup> | Alexa Fluor 647             | 0.01 mg/ml  |
| Calbindin      | L109/57          | 5-TAMRA, Alexa Fluor 488    | 0.01 mg/ml  |
| GFAP           | N206B/9          | 5-TAMRA                     | 0.01 mg/ml  |
| VGluT1         | N28/9            | 5-TAMRA, Alexa Fluor 532    | 0.015 mg/ml |
| PSD-95         | K28/43           | 5-TAMRA                     | 0.01 mg/ml  |
| Kv1.2          | K14/16           | Alexa Fluor 594             | 0.02 mg/ml  |
| Parvalbumin    | L114/81          | Alexa Fluor 647             | 0.01 mg/ml  |
| Neuropeptide Y | L115/13          | Alexa Fluor 594             | 0.01 mg/ml  |

330

331  
332

**Sup. Table 2. The dilution ratios/final concentrations of primary antibodies used in the immunofluorescence of used in this work.**

| Target    | Clone No. | Vendor                  | Catalog No.         | Dilution Ratio/Final concentration |
|-----------|-----------|-------------------------|---------------------|------------------------------------|
| GFP       | N.A.      | ThermoFisher            | A-31852             | 1:200                              |
| Calbindin | L109/57   | Antibodies Incorporated | 75-448              | 1:200                              |
| Calbindin | L109/39   | NeuroMab                | RRID:<br>AB_2877181 | 22.5 µg/ml                         |
| GFAP      | N206B/9   | Antibodies Incorporated | 75-279              | 1:200                              |
| GFAP      | N206B/8   | NeuroMab                | RRID:<br>AB_2877358 | 11.1 µg/ml                         |
| GFAP      | N206B/9   | NeuroMab                | N.A.                | 1:5                                |
| VGluT1    | N28/9     | Antibodies              | 75-066              | 1:200                              |

|                       |                      |                                                     |                  |           |
|-----------------------|----------------------|-----------------------------------------------------|------------------|-----------|
|                       |                      | Incorporated                                        |                  |           |
| <b>VGluT2</b>         | N28/29               | Antibodies<br>Incorporated                          | 75-067           | 1:200     |
| <b>PSD-95</b>         | K28/43               | Antibodies<br>Incorporated                          | 75-028           | 1:200     |
| <b>Kv1.2</b>          | K14/16               | Antibodies<br>Incorporated                          | 75-008           | 1:500     |
| <b>Kv2.1</b>          | N.A.                 | In-house polyclonal<br>rabbit antibody <sup>1</sup> | N.A.             | 1:20      |
| <b>Parvalbumin</b>    | L114/81              | Antibodies<br>Incorporated                          | 75-479           | 1:200     |
| <b>Neuropeptide Y</b> | L115/13              | Antibodies<br>Incorporated                          | 75-456           | 1:200     |
| <b>Calbindin</b>      | L109/57              | Antibodies<br>Incorporated                          | 75-448-<br>FL550 | 1:100     |
| <b>Calbindin</b>      | L109/57              | NeuroMab                                            | N.A.             | 3 µg/ml   |
| <b>Calbindin</b>      | N.A.                 | Synaptic System                                     | 214 005          | 1:100     |
| <b>Parvalbumin</b>    | L114/81              | Antibodies<br>Incorporated                          | 75-479-<br>FL550 | 1:100     |
| <b>Parvalbumin</b>    | L114/81 R<br>(IgG2a) | NeuroMab; <sup>5</sup>                              | N.A.             | 1:2       |
| <b>Parvalbumin</b>    | N.A.                 | Abcam                                               | ab11427          | 1:250     |
| <b>FLAG</b>           | N.A.                 | Millipore                                           | F7425            | 2.5 µg/ml |
| <b>Pan-QKI</b>        | N147/6               | NeuroMab                                            | N.A.             | 2.5 µg/ml |
| <b>GAD1</b>           | L127/8               | NeuroMab                                            | N.A.             | 5 µg/ml   |

333

334  
335

**Sup. Table 3. The dilution ratios/final concentrations of secondary antibodies used in the immunofluorescence of used in this work.**



| <b>Name</b>                                                                       | <b>Fluorescence dye conjugated</b> | <b>Vendor</b>           | <b>Catalog No.</b> | <b>Dilution Ratio</b> |
|-----------------------------------------------------------------------------------|------------------------------------|-------------------------|--------------------|-----------------------|
| <b>Goat anti-Mouse IgG1 Secondary Antibody</b>                                    | Alexa Fluor 488                    | ThermoFisher            | A-21121            | 1:100                 |
| <b>Goat anti-Mouse IgG2a Secondary Antibody</b>                                   | Alexa Fluor 488                    | ThermoFisher            | A-21131            | 1:100; 2 µg/ml        |
| <b>Goat anti-Mouse IgG2b Secondary Antibody</b>                                   | Alexa Fluor 488                    | ThermoFisher            | A-21141            | 1:100; 2 µg/ml        |
| <b>AffiniPure™ Goat Anti-Guinea Pig IgG, F(ab')<sub>2</sub> fragment specific</b> | Alexa Fluor 594                    | Jackson Immuno Research | 106-585-006        | 1:100                 |
| <b>AffiniPure™ Goat Anti-Rabbit IgG, F(ab')<sub>2</sub> fragment specific</b>     | Alexa Fluor 594                    | Jackson Immuno Research | 111-585-006        | 1:100                 |
| <b>Goat anti-Mouse IgG1 Secondary Antibody</b>                                    | CF770                              | Biotium                 | 20254-1            | 1:2500                |
| <b>Donkey anti-Rabbit IgG (H+L) Secondary Antibody</b>                            | CF750                              | Biotium                 | 20298-1            | 2 µg/ml               |
| <b>Goat anti-Mouse IgG2b Secondary Antibody</b>                                   | Alexa Fluor 594                    | ThermoFisher            | A-21145            | 1:2500                |
| <b>Goat anti-Rabbit IgG (H+L) Secondary Antibody</b>                              | Alexa Fluor 488                    | ThermoFisher            | A-11008            | 1:2500                |
| <b>Goat anti-Rabbit IgG (H+L) Secondary Antibody</b>                              | Alexa Fluor 647                    | ThermoFisher            | A-21244            | 2 µg/ml               |
| <b>Goat anti-Mouse IgG1 Secondary Antibody</b>                                    | Alexa Fluor 555                    | ThermoFisher            | A-21127            | 2 µg/ml               |

|                                                     |                 |              |         |         |
|-----------------------------------------------------|-----------------|--------------|---------|---------|
| <b>Goat anti-Mouse IgG2b<br/>Secondary Antibody</b> | Alexa Fluor 555 | ThermoFisher | A-21147 | 2 µg/ml |
| <b>Goat anti-Mouse IgG1<br/>Secondary Antibody</b>  | Alexa Fluor 647 | ThermoFisher | A-21240 | 2 µg/ml |
| <b>Goat anti-Mouse IgG2b<br/>Secondary Antibody</b> | Alexa Fluor 647 | ThermoFisher | A-21242 | 2 µg/ml |

336

337

Sup. Table 4. Information on the validation of the scFvs and their parental mAbs.

| Target         | Clone No. | mAb validation |          |           |              | scFv validation      |
|----------------|-----------|----------------|----------|-----------|--------------|----------------------|
|                |           | COS-IF         | Brain IB | Brain IHC | KO Brain IHC | Method               |
| GFP            | N86/38    | Pass           | NA       | NA        | NA           | COS-IF               |
| Calbindin      | L109/57   | Pass           | Pass     | Pass      | ND           | Brain IHC and COS-IF |
| GFAP<br>R416WT | N206B/9   | Pass           | Pass     | Pass      | Pass         | Brain IHC and COS-IF |
| VGluT1         | N28/9     | Pass           | Pass     | Pass      | ND           | Brain IHC and COS-IF |
| PSD-95         | K28/43    | Pass           | Pass     | Pass      | Pass         | Brain IHC and COS-IF |
| Kv1.2          | K14/16    | Pass           | Pass     | Pass      | Pass         | Brain IHC and COS-IF |
| Parvalbumin    | L114/81   | Pass           | Pass     | Pass      | ND           | Brain IHC and COS-IF |
| NPY            | L115/13   | Pass           | Fail     | Pass      | ND           | COS-IF               |

338

339

Sup. Table 5. Information on the VGluT1 positive terminals.

| Positive terminal No. | Volume / µm <sup>3</sup> | Vesicle Number | Vesicle density per µm <sup>3</sup> | Mito volume / µm <sup>3</sup> | Mito volume ratio |
|-----------------------|--------------------------|----------------|-------------------------------------|-------------------------------|-------------------|
| 1                     | 123.19                   | 436042         | 3540                                | 24.13                         | 19.59%            |
| 2                     | 109.43                   | 426878         | 3901                                | 22.04                         | 20.14%            |
| 3                     | 85.79                    | 292704         | 3412                                | 20.81                         | 24.26%            |
| 4                     | 124.89                   | 409789         | 3281                                | 30.94                         | 24.77%            |
| 5                     | 97.90                    | 233785         | 2388                                | 29.45                         | 30.08%            |
| 6                     | 89.89                    | 255883         | 2847                                | 22.09                         | 24.57%            |
| 7                     | 92.86                    | 277102         | 2984                                | 22.19                         | 23.90%            |

|    |        |        |      |       |        |
|----|--------|--------|------|-------|--------|
| 8  | 84.47  | 246042 | 2913 | 24.43 | 28.92% |
| 9  | 75.39  | 269515 | 3575 | 15.90 | 21.09% |
| 10 | 109.52 | 293002 | 2675 | 31.37 | 28.64% |

340

341

**Sup. Table 6 Information on the VGluT1 negative terminals.**

| <b>Negative terminal No.</b> | <b>Volume / <math>\mu\text{m}^3</math></b> | <b>Vesicle Number</b> | <b>Vesicle density per <math>\mu\text{m}^3</math></b> | <b>Mito volume / <math>\mu\text{m}^3</math></b> | <b>Mito volume ratio</b> |
|------------------------------|--------------------------------------------|-----------------------|-------------------------------------------------------|-------------------------------------------------|--------------------------|
| 1                            | 71.81                                      | 196695                | 2739                                                  | 20.56                                           | 28.63%                   |
| 2                            | 92.23                                      | 268178                | 2812                                                  | 24.62                                           | 26.70%                   |
| 3                            | 75.40                                      | 144275                | 1913                                                  | 24.54                                           | 32.55%                   |
| 4                            | 33.73                                      | 97526                 | 2891                                                  | 10.56                                           | 31.31%                   |
| 5                            | 151.10                                     | 424845                | 2812                                                  | 43.92                                           | 29.07%                   |
| 6                            | 61.82                                      | 142368                | 2303                                                  | 17.92                                           | 29.00%                   |
| 7                            | 40.06                                      | 116529                | 2909                                                  | 9.03                                            | 22.54%                   |
| 8                            | 68.55                                      | 213897                | 3120                                                  | 16.70                                           | 24.36%                   |
| 9                            | 40.73                                      | 120864                | 2968                                                  | 10.50                                           | 25.78%                   |
| 10                           | 42.79                                      | 141617                | 3309                                                  | 9.37                                            | 21.90%                   |

342

343

### **Supplementary References**

344

345

1. Trimmer, J. S. Immunological identification and characterization of a delayed rectifier K<sup>+</sup> channel polypeptide in rat brain. *Proc. Natl. Acad. Sci. U. S. A.* **88**, 10764–10768 (1991).

346

347

2. Januszewski, M. *et al.* High-precision automated reconstruction of neurons with flood-filling networks. *Nat. Methods* **15**, 605–610 (2018).

348

349

3. Meirovitch, Y. *et al.* Cross-classification clustering: An efficient multi-object tracking technique for 3-D instance segmentation in connectomics. *arXiv [cs.CV]* 8425–8435 (2018).

350

351

4. Kirchhofer, A. *et al.* Modulation of protein properties in living cells using nanobodies. *Nat. Struct. Mol.*



352 *Biol.* **17**, 133–138 (2010).

353 5. Andrews, N. P. *et al.* A toolbox of IgG subclass-switched recombinant monoclonal antibodies for  
354 enhanced multiplex immunolabeling of brain. *Elife* **8**, (2019).
